# Supplementary material for: MALDI-TOF mass spectrometry on intact bacteria combined with a refined analysis framework allows accurate classification of MSSA and MRSA
Source: PLoS One. 2019 Jun 27;14(6):e0218951. doi: 10.1371/journal.pone.0218951 (PMC6597085; doi:10.1371/journal.pone.0218951)
Supplement: S1 Table — Tab 1, 2, 3 and 4 represent the Top 100 features for I_BI, I_RF, P_BI, P_RF conditions respectively. (XLSX) [file pone.0218951.s001.xlsx]

## Sheet: TOP100_I_BI_(SupFig_7A)
Rank	The 1th supervised testing	The 2th supervised testing	The 3th supervised testing	The 4th supervised testing	The 5th supervised testing	The 6th supervised testing	The 7th supervised testing	The 8th supervised testing	The 9th supervised testing	The 10th supervised testing	The 11th supervised testing	The 12th supervised testing	The 13th supervised testing	The 14th supervised testing	The 15th supervised testing	The 16th supervised testing	The 17th supervised testing	The 18th supervised testing	The 19th supervised testing	The 20th supervised testing	The 21th supervised testing	The 22th supervised testing	The 23th supervised testing	The 24th supervised testing	The 25th supervised testing	The 26th supervised testing	The 27th supervised testing	The 28th supervised testing	The 29th supervised testing	The 30th supervised testing	The 31th supervised testing	The 32th supervised testing
1	1700.37	1738.27	1812.29	1812.3	1740.31	1740.22	1812.29	1812.27	1700.37	1740.23	1700.29	1774.3	1740.31	1812.22	1700.29	1775.27	1700.3	1776.17	1813.15	1812.3	1738.22	1774.14	1740.05	1739.2	1812.21	1812.1	1813.15	1812.27	1812.21	1740.05	1812.12	1775.27
2	1701.39	1739.26	1739.27	1740.3	1701.37	1739.23	1739.27	1740.25	1701.39	1738.24	1738.25	1812.27	1701.37	1813.22	1738.25	1740.22	1701.32	1812.13	1812.15	1740.3	1775.27	1812.07	1700.1	1812.23	1813.21	1798.09	1812.15	1740.25	1813.21	1700.1	1776.15	1740.22
3	1740.35	1740.27	1701.33	1776.33	1702.34	1812.25	1701.33	1798.25	1740.35	1776.26	1740.25	1776.29	1702.34	1738.21	1740.25	1774.28	1776.31	1739.14	1776.18	1776.33	1774.32	1776.11	1739.07	1738.21	1776.23	1813.11	1776.18	1798.25	1776.23	1739.07	1700.15	1774.28
4	1812.36	1776.3	1738.27	1813.29	1738.31	1738.24	1738.27	1813.27	1812.36	1812.25	1701.28	1740.26	1738.31	1740.2	1701.28	1776.27	1702.32	1777.15	1740.15	1813.29	1796.26	1775.14	1776.11	1813.23	1775.26	1739.1	1740.15	1813.27	1775.26	1776.11	1740.11	1776.27
5	1814.35	1812.27	1776.32	1814.31	1739.3	1722.24	1776.32	1739.24	1814.35	1700.26	1702.28	1700.28	1739.3	1775.24	1702.28	1812.25	1774.33	1813.13	1760.14	1814.31	1797.25	1702.13	1813.07	1700.23	1701.24	1776.14	1760.14	1739.24	1701.24	1813.07	1774.16	1812.25
6	1702.37	1701.31	1700.32	1738.28	1812.33	1760.23	1700.32	1760.25	1702.37	1701.26	1774.29	1738.25	1812.33	1739.2	1774.29	1813.24	1739.28	1700.15	1738.14	1738.28	1814.24	1701.13	1738.07	1774.24	1740.2	1738.1	1738.14	1760.25	1740.2	1738.07	1813.12	1813.24
7	1738.34	1777.29	1702.31	1739.29	1813.33	1813.25	1702.31	1722.25	1738.34	1739.22	1775.3	1775.3	1813.33	1700.24	1775.3	1700.26	1740.3	1701.18	1739.14	1739.29	1739.18	1700.08	1812.07	1775.24	1738.19	1797.11	1739.14	1722.25	1738.19	1812.07	1702.15	1700.26
8	1739.34	1700.29	1740.28	1778.29	1700.34	1798.23	1740.28	1774.3	1739.34	1813.24	1776.29	1813.26	1700.34	1774.25	1776.29	1701.25	1738.28	1738.13	1797.14	1778.29	1702.25	1739.09	1702.1	1702.24	1774.24	1700.12	1797.14	1774.3	1774.24	1702.1	1738.12	1701.25
9	1760.34	1702.29	1760.26	1797.31	1703.32	1776.28	1760.26	1775.29	1760.34	1702.26	1813.26	1701.28	1703.32	1776.25	1813.26	1702.25	1814.31	1775.19	1701.2	1797.31	1813.19	1738.1	1774.12	1776.24	1739.19	1740.09	1701.2	1775.29	1739.19	1774.12	1814.12	1702.25
10	1703.35	1813.27	1722.28	1798.3	1722.31	1701.28	1722.28	1776.3	1703.35	1774.27	1814.25	1702.28	1722.31	1814.22	1814.25	1738.23	1703.3	1774.18	1777.16	1798.3	1701.22	1813.03	1814.09	1701.23	1814.21	1701.14	1777.16	1776.3	1814.21	1814.09	1775.16	1738.23
11	1777.36	1798.27	1774.31	1700.31	1775.36	1774.27	1774.31	1701.3	1777.36	1814.25	1812.27	1739.25	1775.36	1701.24	1812.27	1739.21	1812.31	1702.16	1774.19	1700.31	1776.21	1796.1	1701.11	1703.24	1703.21	1774.15	1774.19	1701.3	1703.21	1701.11	1701.16	1739.21
12	1813.36	1774.3	593.594	1701.33	1776.35	1775.27	593.594	1778.26	1813.36	1775.28	1739.24	1814.27	1776.35	1702.23	1739.24	1814.24	1798.3	1797.16	1775.2	1701.33	1812.19	1797.12	1775.13	1740.21	1700.22	1777.11	1775.2	1778.26	1700.22	1775.13	1739.12	1814.24
13	1774.37	1778.27	1777.31	1774.33	1777.33	1777.26	1777.31	1796.28	1774.37	1777.25	1777.28	1777.27	1777.33	1718.2	1777.28	1797.26	1777.32	1740.13	1798.13	1774.33	1700.2	1798.09	1797.08	1797.25	1760.21	1775.16	1798.13	1796.28	1760.21	1797.08	1796.13	1797.26
14	1776.37	1760.26	1813.29	1777.32	1814.32	1700.26	1813.29	1738.25	1776.37	1703.25	1722.25	1797.29	1814.32	1777.23	1722.25	1723.22	1775.36	1778.12	1702.17	1777.32	1798.23	1703.11	1777.07	1814.22	1798.19	1850.07	1702.17	1738.25	1798.19	1777.07	1777.14	1723.22
15	1775.39	1814.28	1814.28	1799.3	1724.33	1702.25	1814.28	1814.27	1775.39	1778.23	1703.26	1778.26	1724.33	1722.21	1703.26	1777.25	1813.31	1814.16	1778.13	1799.3	1703.21	1740.04	1796.08	1796.24	1702.22	1796.11	1778.13	1814.27	1702.22	1796.08	1797.12	1777.25
16	1778.34	1722.27	1775.32	1775.34	1774.34	1796.25	1775.32	1700.29	1778.34	1760.22	1778.25	1796.29	1774.34	1760.2	1778.25	1760.22	1778.29	1796.15	1700.17	1775.34	1815.22	1777.1	1815.06	1777.22	1777.2	1814.12	1700.17	1700.29	1777.2	1815.06	1703.13	1760.22
17	1741.32	1796.29	1778.28	1815.31	1815.34	1797.25	1778.28	1702.27	1741.32	1796.26	1724.24	1815.26	1815.34	1703.22	1724.24	1798.23	1796.33	1798.13	1796.15	1815.31	1717.25	1814.09	1703.09	1798.24	1797.2	1760.08	1796.15	1702.27	1797.2	1703.09	1741.1	1798.23
18	1797.35	1797.27	1703.28	1702.31	1760.32	1741.22	1703.28	1761.25	1797.35	1815.24	1815.24	1703.27	1760.32	1796.22	1815.24	1703.24	1797.32	635.905	1722.13	1702.31	1741.18	1723.09	1798.07	1815.21	1796.21	1834.11	1722.13	1761.25	1796.21	1798.07	1723.1	1703.24
19	1722.34	1775.31	1723.27	1796.32	1741.29	1761.24	1723.27	1797.28	1722.34	1722.24	1760.24	1798.27	1741.29	1797.23	1760.24	1815.24	1815.31	957.627	1814.15	1796.32	1719.15	1778.08	1760.05	1760.21	1724.21	1702.11	1814.15	1797.28	1724.21	1760.05	1778.1	1815.24
20	1799.34	1815.27	1798.27	1722.29	1778.32	1814.25	1798.27	1834.28	1799.34	1797.25	1723.24	1723.25	1778.32	1815.23	1723.24	1796.25	1723.27	1760.12	1761.12	1722.29	1740.17	613.906	1850.04	1799.25	1815.19	1761.08	1761.12	1834.28	1815.19	1850.04	1761.1	1796.25
21	1815.32	1703.27	1796.29	1761.28	1798.31	1815.26	1796.29	1723.25	1815.32	1718.23	1796.26	1760.24	1798.31	1723.2	1796.26	1778.24	599.978	1834.15	1815.13	1761.28	636.932	635.894	1834.07	1851.23	1741.18	1778.09	1815.13	1723.25	1741.18	1834.07	1722.1	1778.24
22	1796.36	1851.25	1815.3	1760.28	1761.3	1778.24	1815.3	1850.24	1796.36	1798.25	1761.24	1717.26	1761.3	1741.19	1761.24	1834.24	1097.66	1761.14	1834.14	1760.28	599.964	636.913	1723.05	1778.22	1778.19	1815.1	1834.14	1850.24	1778.19	1723.05	1815.11	1834.24
23	1798.34	1799.27	1724.27	1703.3	1797.32	1800.21	1724.27	1799.27	1798.34	1717.23	1797.26	1799.26	1797.32	1778.21	1797.26	1722.22	614.954	1799.12	1703.15	1703.3	1850.21	637.902	1778.06	1717.2	1761.17	1703.11	1703.15	1799.27	1761.17	1778.06	1798.11	1722.22
24	1704.35	1723.26	1797.27	1723.28	1723.3	1723.23	1797.27	1777.28	1704.35	1723.23	1741.23	1741.24	1723.3	1761.21	1741.23	1741.21	1834.34	1851.11	1741.13	1723.28	1723.18	1834.06	1761.07	1834.28	1723.17	1741.08	1741.13	1777.28	1723.17	1761.07	1760.09	1741.21
25	1724.32	1741.25	1761.27	1741.27	1796.32	1799.24	1761.27	1815.26	1724.32	1741.21	1798.25	1718.25	1796.32	1798.21	1798.25	1761.23	1817.28	1703.14	1723.12	1741.27	1777.18	2433.29	1741.05	1850.2	1799.19	1816.1	1723.12	1815.26	1799.19	1741.05	1724.1	1761.23
26	1718.34	1724.26	1867.25	1834.35	777.033	1834.24	1867.25	793.006	1718.34	1991.28	2378.62	1761.25	777.033	1834.24	2378.62	1717.21	1722.28	1815.13	1800.12	1834.35	1778.2	1722.08	1816.08	1723.21	1834.22	1835.1	1800.12	793.006	1834.22	1816.08	1867.08	1717.21
27	1723.33	1761.26	1897.3	1850.27	1799.31	1850.22	1897.3	1703.26	1723.33	1704.23	2038.35	2238.61	1799.31	1717.18	2038.35	1799.24	635.933	622.943	1835.15	1850.27	1818.15	1483.9	1835.07	636.939	1718.17	1800.08	1835.15	1703.26	1718.17	1835.07	1835.12	1799.24
28	1717.33	597.979	2164.44	1851.27	1673.16	1703.24	2164.44	1741.24	1717.33	1724.21	1718.25	1722.25	1673.16	1724.21	1718.25	1816.25	957.662	614.918	1850.11	1851.27	1722.2	1815.08	3044.79	637.936	599.978	1851.07	1850.11	1741.24	599.978	3044.79	990.588	1816.25
29	598.004	1834.26	791.008	593.594	585.023	1724.24	791.008	1724.26	598.004	871.564	593.59	1850.25	585.023	1956.26	593.59	1850.22	1760.27	958.613	2187.33	593.594	1834.23	1717.11	2288.39	3007.08	598.966	1722.08	2187.33	1724.26	598.966	2288.39	1850.08	1850.22
30	614.99	1717.25	1994.35	614.977	1717.27	792.994	1994.35	593.586	614.99	1956.28	1717.23	599.992	1717.27	629.922	1717.23	1867.21	1845.31	637.914	2538.51	614.977	1854.22	1799.07	1722.06	1718.18	1722.17	1723.08	2538.51	593.586	1722.17	1722.06	1799.08	1867.21
31	1837.35	1850.26	1559.09	635.959	1837.32	629.928	1559.09	790.998	1837.35	1850.23	2045.39	1834.26	1837.32	2164.37	2045.39	1724.23	598.971	636.921	792.967	635.959	957.643	561.968	1800.04	1722.21	584.975	1799.09	792.967	790.998	584.975	1800.04	1807.07	1724.23
32	599.019	1956.3	2076.39	813.008	2164.49	1717.19	2076.39	1816.27	599.019	629.932	1500.99	2326.63	2164.49	597.963	1500.99	2238.57	600.974	613.916	1724.14	813.008	635.913	614.909	1717.04	1830.25	776.979	3044.8	1724.14	1816.27	776.979	1717.04	1816.12	2238.57
33	2099.47	629.937	2754.84	1724.29	1762.3	599.986	2754.84	1800.23	2099.47	1834.23	1994.3	793.009	1762.3	636.937	1994.3	585.004	1482.99	1779.1	593.548	1724.29	584.966	1325.79	2327.37	792.989	1779.18	636.912	593.548	1800.23	1779.18	2327.37	2057.21	585.004
34	777.05	1800.24	2130.44	597.987	597.996	1851.2	2130.44	1851.22	777.05	635.945	1615.06	635.95	597.996	1899.24	1615.06	636.946	1818.29	1850.1	635.917	597.987	1837.22	2676.42	2237.37	1761.22	1816.2	614.916	635.917	1851.22	1816.2	2237.37	635.907	636.946
35	600.017	1718.26	2595.78	599.999	1718.3	790.99	2595.78	2076.41	600.017	593.579	2231.52	1728.17	1718.3	1799.21	2231.52	635.935	1718.28	1741.11	1483.94	599.999	792.972	1646.97	1799.06	1779.23	1850.17	792.944	1483.94	2076.41	1850.17	1799.06	1718.1	635.935
36	1671.17	635.95	1488.02	958.689	601.015	2164.4	1488.02	585.018	1671.17	1728.14	2014.34	1851.25	601.015	1816.22	2014.34	1718.21	1799.29	2006.17	1799.12	958.689	1835.24	1760.09	1757.05	599.977	1800.18	1717.06	1799.12	585.018	1800.18	1757.05	1750.02	1718.21
37	1851.31	593.583	1751.19	793.021	793.027	636.946	1751.19	600.997	1851.31	1851.22	1067.65	2464.7	793.027	1800.19	1067.65	593.581	1741.27	1836.14	2099.27	793.021	1761.16	800.453	2344.39	600.977	527.216	760.965	2099.27	600.997	527.216	2344.39	1834.14	593.581
38	1761.32	614.964	1501.02	1816.31	1834.34	635.936	1501.02	599.996	1761.32	1672.1	1685.14	629.936	1834.34	1850.2	1685.14	599.988	597.965	598.942	565.521	1816.31	1483.97	1718.08	2239.37	584.993	600.966	599.949	565.521	599.996	600.966	2239.37	2238.43	599.988
39	1834.4	793.01	793.013	791.014	1956.36	2076.37	793.013	777.011	1834.4	2099.39	1558.09	2289.66	1956.36	560.999	1558.09	2237.57	790.984	599.95	599.966	791.014	598.951	1724.07	2305.41	622.967	635.922	600.939	599.966	777.011	635.922	2305.41	2327.46	2237.57
40	1994.42	812.995	1731.18	1717.28	791.019	1762.22	1731.18	1717.22	1994.42	2326.6	1728.16	2327.64	791.019	2237.53	1728.16	2327.59	1445.99	1722.13	2164.27	1717.28	1911.27	771.434	2342.37	635.929	597.962	1782.05	2164.27	1717.22	597.962	2342.37	599.959	2327.59
41	1800.32	1782.26	1615.08	629.941	2076.46	1956.28	1615.08	775.017	1800.32	2165.39	2656.76	3007.12	2076.46	2614.7	2656.76	597.971	584.983	1724.12	527.22	629.941	881.564	792.944	2238.37	1816.26	614.944	635.895	527.22	775.017	614.944	2238.37	597.945	597.971
42	601.025	636.96	1674.13	599.001	593.614	812.979	1674.13	1501	601.025	2038.33	570.332	585.012	593.614	1759.21	570.332	756.999	593.578	1782.12	2076.26	599.001	614.929	2710.42	2217.35	598.972	1817.18	637.906	2076.26	1501	1817.18	2217.35	600.946	756.999
43	629.958	791.006	1741.26	1782.26	599.008	597.972	1741.26	598.993	629.958	2557.79	614.957	636.959	599.008	637.933	614.957	775.007	637.947	1817.11	2824.65	1782.26	651.902	599.942	1851.04	3045.08	1956.24	651.877	2824.65	598.993	1956.24	1851.04	1717.08	775.007
44	793.044	598.992	2184.48	585.02	600.011	2085.38	2184.48	2164.45	793.044	792.997	2238.58	812.994	600.011	792.982	2238.58	790.987	2384.74	651.886	1629	585.02	1875.23	724.392	636.904	2289.63	1762.18	1852.1	1629	2164.45	1762.18	636.904	2734.56	790.987
45	2038.43	651.934	1398.95	636.969	1800.29	613.945	1398.95	1751.16	2038.43	1761.23	2408.65	1724.23	1800.29	2327.55	2408.65	2164.39	1724.26	792.957	1867.12	636.969	600.957	1390.83	1831.13	596.961	2288.56	597.935	1867.12	1751.16	2288.56	1831.13	2289.46	2164.39
46	583.038	773.004	1750.14	651.945	614.975	584.997	1750.14	636.956	583.038	3007.08	2468.71	1816.27	614.975	1851.18	2468.71	2464.64	1851.27	1704.12	614.937	651.945	637.927	1741.04	2341.36	1756.17	542.981	598.936	614.937	636.956	542.981	2341.36	2326.42	2464.64
47	1956.38	613.957	1970.32	2199.64	1501.03	1329.88	1970.32	812.993	1956.38	613.949	2356.55	593.591	1501.03	1837.22	2356.55	600.986	866.62	790.95	2825.67	2199.64	1890.16	1761.09	597.924	2341.6	583.977	790.938	2825.67	812.993	583.977	597.924	1027.62	600.986
48	635.985	599.99	2777.98	601.004	1816.32	1718.22	2777.98	1852.25	635.985	2469.62	1807.22	597.978	1816.32	1748.12	1807.22	1558.07	1717.27	600.944	600.955	601.004	1760.18	2030.17	1956.12	1757.19	790.971	2076.22	600.955	1852.25	790.971	1956.12	527.208	1558.07
49	585.036	777.02	1663.12	777.027	2087.49	1816.24	1663.12	2823.87	585.036	636.949	1867.21	1704.26	2087.49	1855.18	1867.21	2014.32	761.005	558.947	1816.14	777.027	3045.06	598.932	2259.37	651.918	1717.15	1724.1	1816.14	2823.87	1717.15	2259.37	598.95	2014.32
50	791.036	1704.26	1676.15	1704.28	2080.49	614.951	1676.15	614.965	791.036	1799.23	1992.31	1835.29	2080.49	619.956	1992.31	598.983	1244.88	1400.84	584.967	1704.28	790.963	1348.82	2303.41	1835.25	2076.39	1817.08	584.967	614.965	2076.39	2303.41	1429.87	598.983
51	1685.22	580.989	2099.43	1800.26	1850.3	1751.15	2099.43	1956.31	1685.22	1816.25	2294.61	551.539	1850.3	1558.05	2294.61	1851.2	1850.26	597.939	790.959	1800.26	619.953	1621.96	2289.41	619.962	2217.53	621.925	790.959	1956.31	2217.53	2289.41	1836.12	1851.2
52	593.626	2164.42	1693.15	637.965	1240.85	598.983	1693.15	637.952	593.626	585.987	669.401	614.969	1240.85	2525.65	669.401	1731.14	1245.86	620.939	1807.09	637.965	958.63	823.518	2309.38	2238.57	774.989	957.611	1807.09	637.952	774.989	2309.38	638.935	1731.14
53	2076.53	1852.26	1629.12	1835.32	543.022	651.919	1629.12	629.933	2076.53	597.969	1693.13	1956.31	543.022	599.978	1693.13	2326.58	1684.14	960.594	1751.06	1835.32	1762.16	2168.19	2306.39	776.009	596.952	596.924	1751.06	629.933	596.952	2306.39	1244.8	2326.58
54	2080.52	600.997	2026.37	1852.28	1704.31	600.988	2026.37	1558.08	2080.52	1244.87	2375.6	600.995	1704.31	600.979	2375.6	1956.29	1852.28	1872.17	503.307	1852.28	760.99	2043.3	2979.8	777.006	990.62	1836.1	503.307	1558.08	990.62	2979.8	2099.24	1956.29
55	1779.32	637.956	597.994	1779.27	2170.52	2539.67	597.994	1488.01	1779.32	2327.6	1244.88	637.955	2170.52	790.979	1244.88	1958.3	1402.93	1873.15	597.954	1779.27	1757.17	585.944	599.94	812.973	2237.53	2085.22	597.954	1488.01	2237.53	599.94	797.471	1958.3
56	1850.33	1835.31	1219.83	2143.44	2554.82	621.963	1219.83	2085.41	1850.33	622.973	1750.13	651.934	2554.82	2083.35	1750.13	1500.98	776.993	753.431	651.894	2143.44	1852.18	619.38	1718.05	1852.22	1318.82	622.933	651.894	2085.41	1318.82	1718.05	1800.09	1500.98
57	2170.56	1836.29	1807.25	957.702	2826.95	637.942	1807.25	597.983	2170.56	651.927	2173.51	577.012	2826.95	1756.17	2173.51	1750.12	1484.03	1723.11	598.959	957.702	1874.24	866.562	3005.82	614.95	2344.58	824.494	598.959	597.983	2344.58	3005.82	2164.24	1750.12
58	1624.14	1816.27	1834.3	583.021	1712.19	593.573	1834.3	860.577	1624.14	600.987	2336.58	598.992	1712.19	2085.34	2336.58	1782.2	1761.27	1742.11	638.941	583.021	866.605	920.549	635.883	866.589	1851.15	2239.41	638.941	860.577	1851.15	635.883	2753.61	1782.2
59	701.495	2076.41	1855.25	2164.45	561.028	1782.2	1855.25	1779.24	701.495	637.946	1690.13	1685.15	561.028	582.997	1690.13	637.941	1133.74	2630.57	1687.02	2164.45	2980.07	1363.85	622.926	1340.92	3007.03	613.908	1687.02	1779.24	3007.03	622.926	2468.51	637.941
60	1852.31	1837.27	2521.73	2326.66	636.972	1307.86	2521.73	583.013	1852.31	1719.21	1731.17	2408.65	636.972	584.989	1731.17	759.026	583.983	1483.93	1411.85	2326.66	823.551	600.933	2326.38	523.432	957.647	1470.88	1411.85	583.013	957.647	2326.38	2680.57	759.026
61	2199.71	2407.65	599.005	2289.69	1513.04	543.016	599.005	635.949	2199.71	2110.45	1864.25	1852.23	1513.04	613.937	1864.25	583.006	1994.39	1718.12	1557.96	2289.69	1718.17	1440.84	2345.4	1362.92	1835.2	1483.91	1557.96	635.949	1835.2	2345.4	584.96	583.006
62	2087.52	1756.23	1956.31	551.552	1613.12	777.003	1956.31	1782.22	2087.52	2209.52	1922.31	791.003	1613.12	1244.86	1922.31	2540.66	636.952	1827.1	2057.23	551.552	596.946	840.461	614.907	2239.58	1244.85	1757.07	2057.23	1782.22	1244.85	614.907	1068.59	2540.66
63	2082.52	2165.43	2045.42	561.02	1751.22	583.006	2045.42	1069.73	2082.52	2238.58	2184.45	2199.6	1751.22	1067.62	2184.45	561.002	1745.22	596.932	583.971	561.02	622.959	1569.89	637.895	756.997	866.599	1818.08	583.971	1069.73	866.599	637.895	2295.42	561.002
64	1387.96	2469.67	2080.45	745.524	2237.66	2808.84	2080.45	651.926	1387.96	2538.67	2372.62	1756.23	2237.66	1685.11	2372.62	2235.52	2157.57	700.501	637.928	745.524	700.529	1749.97	1318.74	1741.18	636.942	1762.08	637.928	651.926	636.942	1318.74	593.545	2235.52
65	2257.68	1712.15	2662.83	2000.32	2438.68	1712.12	2662.83	1046.68	2257.68	812.981	2023.37	2229.51	2438.68	1762.19	2023.37	2640.73	596.961	1852.12	1973.18	2000.32	1724.19	1808.05	1749.95	620.964	1873.22	1873.1	1973.18	1046.68	1873.22	1749.95	560.97	2640.73
66	1785.25	1387.91	1963.33	2238.65	1759.3	1779.21	1963.33	1643.08	1785.25	1756.2	2410.65	1991.3	1759.3	1807.19	2410.65	1673.11	893.647	2159.32	2218.36	2238.65	1779.23	1951.06	990.56	1800.19	929.625	2164.21	2218.36	1643.08	929.625	990.56	1242.75	1673.11
67	1991.41	958.675	2166.52	1756.27	2163.5	1855.22	2166.52	2107.39	1991.41	737.033	2076.38	1800.23	2163.5	2155.39	2076.38	1837.24	1318.83	621.933	1851.1	1756.27	1482.96	2009.09	598.926	737.028	1335.85	2287.44	1851.1	2107.39	1335.85	598.926	2610.58	1837.24
68	565.587	1671.1	585.019	1718.28	581.002	1362.93	585.019	2125.41	565.587	1067.64	2099.39	2190.54	581.002	2539.63	2099.39	614.955	1872.31	1320.79	1956.18	1718.28	1069.66	676.364	2538.41	3009.08	1704.2	580.945	1956.18	2125.41	1704.2	2538.41	1742.1	614.955
69	1483.06	622.98	1558.1	584.023	635.968	1785.18	1558.1	1673.12	1483.06	1558.06	2130.43	2155.46	635.968	635.931	2130.43	1852.21	1696.17	2982.39	2289.49	584.023	2018.37	1545.88	3006.8	3038.05	2199.54	2289.45	2289.49	1673.12	2199.54	3006.8	583.961	1852.21
70	1756.31	1779.24	1628.1	1836.31	1940.33	1676.12	1628.1	2170.46	1756.31	2289.63	2444.68	798.014	1940.33	2014.3	2444.68	1719.2	1416.94	1835.17	2752.61	1836.31	1895.32	2076.1	866.541	597.961	2239.55	2364.41	2752.61	2170.46	2239.55	866.541	614.929	1719.2
71	813.025	2026.35	651.942	2024.46	1992.39	1387.91	651.942	2069.35	813.025	2000.29	597.983	865.629	1992.39	2028.31	597.983	1748.15	1572.1	623.37	957.632	2024.46	620.952	2171.22	1836.07	2326.6	2287.58	619.931	957.632	2069.35	2287.58	1836.07	2187.31	1748.15
72	2734.97	583.012	1641.11	1558.1	1643.14	1558.06	1641.11	621.972	2734.97	551.53	2029.35	915.644	1643.14	1698.1	2029.35	1759.23	1704.29	937.572	2327.49	1558.1	1318.8	560.955	2343.36	2327.58	2540.67	860.511	2327.49	621.972	2540.67	2343.36	2538.48	1759.23
73	1835.37	1727.19	2231.55	622.988	775.039	1629.09	2231.55	929.667	1835.37	1886.23	2106.43	916.638	775.039	1719.18	2106.43	1800.21	1725.27	2296.46	636.933	622.988	1817.2	1503.89	928.525	3039.09	1911.26	1779.07	636.933	929.667	1911.26	928.525	2344.43	1800.21
74	2856.05	2069.36	2337.62	1837.29	1431.01	580.981	2337.62	1957.34	2856.05	599.983	2285.56	1719.23	1431.01	2113.42	2285.56	2539.67	1282.83	2306.51	2287.49	1837.29	2411.61	2217.26	2287.4	1719.2	2343.54	2314.42	2287.49	1957.34	2343.54	2287.4	570.299	2539.67
75	1067.7	737.046	2652.8	2076.45	1809.29	1628.07	2652.8	757.007	1067.7	790.994	2667.73	2214.51	1809.29	2854.84	2667.73	1287.85	1779.28	542.964	1038.62	2076.45	538.47	871.499	1759.06	613.94	758.997	2345.43	1038.62	757.007	758.997	1759.06	1003.58	1287.85
76	669.444	3006.15	1649.14	757.027	2194.57	1399.91	1649.14	1685.14	669.444	2808.84	1952.28	2237.62	2194.57	2326.56	1952.28	1643.08	622.974	583.962	1429.9	757.027	3006.12	1318.74	1794.1	790.984	1759.18	2554.57	1429.9	1685.14	1759.18	1794.1	2652.56	1643.08
77	674.471	1713.18	1671.13	2099.43	583.029	1659.12	1671.13	1900.3	674.471	1483.99	651.935	2288.66	583.029	2231.47	651.935	3007.07	2557.93	629.892	1883.14	2099.43	1148.71	1362.85	2315.36	1221.79	1282.81	1683.97	1883.14	1900.3	1282.81	2315.36	1558.96	3007.07
78	1712.22	1927.32	1685.15	1686.19	2060.45	1836.25	1685.15	2554.78	1712.22	2214.47	2209.5	2344.63	2060.45	593.57	2209.5	3509.33	1809.29	1556.89	2554.55	1686.19	2326.64	2014.09	2260.39	1298.82	560.987	1853.13	2554.55	2554.78	560.987	2260.39	1748.03	3509.33
79	1816.36	584.016	1785.21	1970.38	2595.85	1985.27	1785.21	2397.65	1816.36	2237.58	2539.68	565.555	2595.85	598.974	2539.68	1756.2	1856.34	1755.1	1782.1	1970.38	597.95	597.929	1724.07	1857.3	582.986	1069.62	1782.1	2397.65	582.986	1724.07	928.547	1756.2
80	2237.7	620.974	1799.26	775.036	3045.17	2088.33	1799.26	2540.7	2237.7	669.408	2628.79	2110.47	3045.17	2045.36	2628.79	1835.25	537.472	1800.09	3508.09	775.036	1756.15	619.928	774.944	2099.36	593.572	1759.08	3508.09	2540.7	593.572	774.944	1569.92	1835.25
81	2238.72	621.977	1800.25	837.589	1851.26	620.964	1800.25	1762.23	2238.72	2069.33	1748.16	2538.7	1851.26	614.937	1748.16	812.979	1069.68	1816.14	1101.67	837.589	2365.64	801.46	1852.05	2306.62	2238.55	2347.44	1101.67	1762.23	2238.55	1852.05	1589.95	812.979
82	1619.17	1329.9	1895.31	2425.69	1898.33	1749.15	1895.31	1808.23	1619.17	2539.68	2237.58	584.012	1898.33	756.986	2237.58	1807.21	1713.19	2001.17	1571.97	2425.69	2515.68	550.044	2221.36	2329.58	3044.94	2359.4	1571.97	1808.23	3044.94	2221.36	637.919	1807.21
83	1845.34	2099.39	2125.42	621.985	1687.2	1512.98	2125.42	1980.34	1845.34	2752.8	561.015	1195.79	1687.2	622.958	561.015	1647.07	1714.2	2385.44	2239.45	621.985	2862.81	913.511	760.951	3008.09	637.937	2259.4	2239.45	1980.34	637.937	760.951	1557.94	1647.07
84	1971.41	2755.86	2577.77	865.644	1624.12	1852.23	2577.77	2026.36	1971.41	598.983	790.998	1472	1624.12	2238.54	790.998	1952.28	542.988	2446.45	2640.59	865.644	721.516	2101.12	1762.06	576.994	2305.59	3043.82	2640.59	2026.36	2305.59	1762.06	2076.23	1952.28
85	637.985	757.019	2681.82	915.66	2077.49	2163.42	2681.82	3509.38	637.985	1226.85	893.602	1558.08	2077.49	1613.05	893.602	2113.44	565.538	2667.61	1578.96	915.66	1759.18	2464.3	1756.03	629.924	2326.54	624.337	1578.96	3509.38	2326.54	1756.03	2288.44	2113.44
86	2069.43	551.544	669.41	1727.22	1377.95	619.962	669.41	967.637	2069.43	2023.4	1671.11	2038.36	1377.95	2000.26	1671.11	2288.61	775.006	737.482	1714.06	1727.22	542.969	584.947	799.434	1831.26	2541.63	753.415	1714.06	967.637	2541.63	799.434	2396.43	2288.61
87	2142.48	585.008	1513	1820.29	1387.95	2012.32	1513	1302.86	2142.48	577.012	1997.32	2050.37	1387.95	2068.3	1997.32	990.636	929.641	1756.1	2103.29	1820.29	893.642	955.577	1817.06	824.54	3023.02	1718.07	2103.29	1302.86	3023.02	1817.06	2413.45	990.636
88	2163.54	960.644	1613.08	1757.27	1558.14	2170.43	1613.08	2595.77	2163.54	670.411	2083.4	1757.24	1558.14	2099.36	2083.4	2085.37	943.619	593.534	1264.76	1757.27	580.962	996.586	572.29	929.643	580.97	1956.13	1264.76	2595.77	580.97	572.29	1471.89	2085.37
89	2164.52	1809.26	1715.18	1956.33	1779.29	880.56	1715.18	1414.94	2164.52	2045.39	2854.86	1836.28	1779.29	2538.63	2854.86	2055.31	2296.68	1460.91	1469.9	1956.33	2109.39	1081.63	1779.05	538.466	837.569	1015.61	1469.9	1414.94	837.569	1779.05	1956.15	2055.31
90	2326.73	2170.48	1752.2	2721.86	1984.37	1457.93	1752.2	1489.02	2326.73	2583.72	1673.11	613.957	1984.37	651.913	1673.11	2431.62	1284.84	586.951	1671.02	2721.86	2177.5	1762.08	1830.1	580.406	893.632	1891.08	1671.02	1489.02	893.632	1830.1	2155.28	2431.62
91	2356.7	1199.83	1965.33	2288.69	1980.38	2015.33	1965.33	1536.04	2356.7	1685.13	1995.3	775.026	1980.38	776.999	1995.3	2554.73	1756.25	796.954	1920.17	2288.69	914.569	2750.43	1854.13	823.549	1782.16	1872.11	1920.17	1536.04	1782.16	1854.13	2212.35	2554.73
92	2183.62	1535.02	1097.71	930.663	3508.46	1673.09	1097.71	1627.08	2183.62	1837.24	2425.66	825.558	3508.46	1512.97	2425.66	584.001	837.588	760.976	2823.65	930.663	1380.89	593.53	1172.67	1244.87	2259.54	2343.4	2823.65	1627.08	2259.54	1172.67	2694.6	584.001
93	2755.96	1762.23	1470.99	1069.73	2326.68	1413.94	1470.99	1759.26	2755.96	1951.31	585.01	1758.25	2326.68	1757.2	585.01	613.944	2478.8	930.588	1207.73	1069.73	776.977	1382.84	1221.69	1782.2	756.465	2344.43	1207.73	1759.26	756.465	1221.69	582.968	613.944
94	636.987	1785.2	1627.1	543.024	637.969	596.964	1627.1	2015.35	636.987	2004.29	2028.36	2808.88	637.969	501.053	2028.36	651.919	594.532	1069.62	1501.92	543.024	1629.02	596.925	2253.33	1910.3	958.635	620.933	1501.92	2015.35	958.635	2253.33	774.962	651.919
95	551.582	2326.64	1947.38	2661.86	2125.46	1192.79	1947.38	2080.45	551.582	2076.36	2037.35	929.66	2125.46	862.538	2037.35	1685.12	916.626	584.956	2172.37	2661.86	1758.15	786.46	2346.4	1954.3	1831.24	866.558	2172.37	2080.45	1831.24	2346.4	790.947	1685.12
96	570.366	2660.82	2172.53	1685.17	1527.12	2083.38	2172.53	2237.59	570.366	2155.43	2163.41	957.688	1527.12	1508.98	2163.41	2056.38	920.602	638.937	542.977	1685.17	774.983	1062.63	3007.79	775.004	797.496	1751	542.977	2237.59	797.496	3007.79	920.556	2056.38
97	1719.31	1388.94	2250.53	2327.68	1649.17	1957.32	2250.53	745.508	1719.31	614.95	1956.29	1068.67	1649.17	1536	1956.29	2239.56	958.647	838.535	582.977	2327.68	838.562	1270.76	3008.81	1837.24	1758.18	1854.13	582.977	745.508	1758.18	3008.81	1318.77	2239.56
98	1782.33	1728.17	2483.73	613.965	2171.57	1809.21	2483.73	2433.64	1782.33	1779.23	2538.67	1244.89	2171.57	1649.07	2538.67	581.377	1122.72	862.52	1569.93	613.965	860.546	1534.9	3027.81	2343.58	995.609	2693.55	1569.93	2433.64	995.609	3027.81	1762.09	581.377
99	2097.54	1730.19	3509.37	1648.14	1852.28	2107.36	3509.37	880.57	2097.54	1836.27	599.995	1930.36	1852.28	1750.09	599.995	1757.22	1793.34	2308.48	1874.14	1648.14	1816.23	514.28	1891.03	2288.61	1172.74	3006.83	1874.14	880.57	1172.74	1891.03	2055.17	1757.22
100	1922.4	2000.31	2478.76	795.53	2028.39	2125.37	2478.76	1890.23	1922.4	1954.3	845.508	2165.41	2028.39	2481.61	845.508	1836.24	1956.35	823.529	906.534	795.53	894.603	576.992	2304.41	635.425	1856.2	584.946	906.534	1890.23	1856.2	2304.41	825.503	1836.24

## Sheet: TOP100_I_RF_(SupFig_7B)
Rank	The 1th supervised testing	The 2th supervised testing	The 3th supervised testing	The 4th supervised testing	The 5th supervised testing	The 6th supervised testing	The 7th supervised testing	The 8th supervised testing	The 9th supervised testing	The 10th supervised testing	The 11th supervised testing	The 12th supervised testing	The 13th supervised testing	The 14th supervised testing	The 15th supervised testing	The 16th supervised testing	The 17th supervised testing	The 18th supervised testing	The 19th supervised testing	The 20th supervised testing	The 21th supervised testing	The 22th supervised testing	The 23th supervised testing	The 24th supervised testing	The 25th supervised testing	The 26th supervised testing	The 27th supervised testing	The 28th supervised testing	The 29th supervised testing	The 30th supervised testing	The 31th supervised testing	The 32th supervised testing
1	1701.39	1740.27	1813.29	1812.3	1740.31	1738.24	1813.29	1812.27	1700.37	1740.23	1740.25	1812.27	1740.31	1812.22	1740.25	1740.22	1776.31	1776.17	1812.15	1812.3	1775.27	1774.14	1700.1	1812.23	1812.21	1798.09	1813.15	1798.25	1813.21	1739.07	1740.11	1812.25
2	1738.34	1739.26	1701.33	1740.3	1813.33	1740.22	1812.29	1739.24	1701.39	1702.26	1700.29	1774.3	1702.34	1738.21	1702.28	1775.27	1774.33	1812.13	1813.15	1777.32	1738.22	1775.14	1740.05	1739.2	1813.21	1812.1	1812.15	1740.25	1775.26	1813.07	1812.12	1775.27
3	1740.35	1812.27	1740.28	1813.29	1701.37	1812.25	1760.26	1798.25	1812.36	1812.25	1702.28	1740.26	1812.33	1739.2	1700.29	1812.25	1700.3	1813.13	1740.15	1798.3	1796.26	1812.07	1776.11	1813.23	1776.23	1700.12	1776.18	1812.27	1812.21	1776.11	1776.15	1774.28
4	1814.35	1702.29	1760.26	1774.33	1738.31	1798.23	1701.33	1760.25	1740.35	1701.26	1738.25	1814.27	1700.34	1813.22	1738.25	1774.28	1702.32	1739.14	1776.18	1813.29	1774.32	1776.11	1738.07	1775.24	1814.21	1740.09	1797.14	1760.25	1740.2	1740.05	1738.12	1740.22
5	1777.36	1738.27	1722.28	1739.29	1812.33	1739.23	593.594	1813.27	1760.34	1700.26	1776.29	1776.29	1813.33	1740.2	1814.25	1813.24	1738.28	1777.15	1797.14	1739.29	1797.25	1700.08	1739.07	1774.24	1739.19	1813.11	1701.2	1775.29	1701.24	1700.1	1774.16	1738.23
6	1760.34	1701.31	1812.29	1814.31	1775.36	1813.25	1700.32	1740.25	1739.34	1738.24	1739.24	1738.25	1739.3	1701.24	1812.27	1797.26	1701.32	1701.18	1798.13	1701.33	1814.24	1702.13	1813.07	1738.21	1775.26	1701.14	1738.14	1813.27	1774.24	1738.07	1700.15	1813.24
7	1739.34	1813.27	1702.31	1701.33	1703.32	1701.28	1739.27	1774.3	1702.37	1813.24	1774.29	1813.26	1738.31	1774.25	1813.26	1701.25	1703.3	1738.13	1774.19	1740.3	1701.22	1701.13	1812.07	1740.21	1740.2	1776.14	1740.15	1739.24	1776.23	1701.11	1813.12	1760.22
8	1702.37	1776.3	1776.32	1778.29	1702.34	1760.23	1776.32	1776.3	1738.34	1776.26	1813.26	1700.28	1722.31	1776.25	1774.29	1738.23	1740.3	1774.18	1775.2	1814.31	1739.18	1797.12	1775.13	1776.24	1738.19	1797.11	1796.15	1774.3	1738.19	1812.07	1702.15	1776.27
9	1700.37	1778.27	593.594	1776.33	1739.3	1776.28	1738.27	1834.28	1814.35	1703.25	1701.28	1775.3	1814.32	1814.22	1775.3	1739.21	1814.31	1700.15	1760.14	1797.31	1812.19	1739.09	1774.12	1700.23	1701.24	1739.1	1778.13	1701.3	1739.19	1702.1	1739.12	1739.21
10	1812.36	1777.29	1739.27	1738.28	1814.32	1723.23	1722.28	1796.28	1703.35	1739.22	1812.27	1701.28	1703.32	1775.24	1739.24	1723.22	1775.36	1775.19	1796.15	1702.31	1702.25	1738.1	1701.11	1796.24	1760.21	1796.11	1700.17	1776.3	1814.21	1774.12	1797.12	1702.25
11	1813.36	1796.29	1738.27	1703.3	1722.31	1777.26	1740.28	1775.29	1777.36	1814.25	1814.25	1739.25	1701.37	1702.23	1776.29	1700.26	1798.3	1797.16	1777.16	1776.33	1813.19	1796.1	1702.1	1703.24	1774.24	1850.07	1774.19	1796.28	1760.21	1797.08	1814.12	1814.24
12	1703.35	1797.27	1777.31	1775.34	1776.35	1796.25	1774.31	1722.25	1776.37	1775.28	1775.3	1777.27	1775.36	1703.22	1777.28	1702.25	1739.28	1702.16	1739.14	1778.29	1798.23	1798.09	1814.09	1701.23	1798.19	1814.12	1775.2	1799.27	1700.22	1775.13	1775.16	1723.22
13	1776.37	1760.26	1703.28	1796.32	1700.34	1797.25	1777.31	1778.26	1778.34	1774.27	1777.28	1702.28	1777.33	1700.24	1701.28	1776.27	1812.31	1778.12	1738.14	1775.34	1776.21	1740.04	1796.08	1797.25	1703.21	1738.1	1760.14	1761.25	1798.19	1703.09	1796.13	1700.26
14	1774.37	1700.29	1700.32	1797.31	1815.34	1775.27	1702.31	1700.29	1797.35	1777.25	1778.25	1703.27	1760.32	1723.2	1703.26	1814.24	1796.33	1814.16	1702.17	1774.33	1703.21	1703.11	1777.07	1702.24	1777.2	1777.11	1815.13	1722.25	1702.22	1814.09	1701.16	1797.26
15	1775.39	1798.27	1774.31	1798.3	1777.33	1800.21	1723.27	1723.25	1774.37	1760.22	1703.26	1797.29	1774.34	1760.2	1722.25	1760.22	1778.29	1740.13	1814.15	1700.31	957.643	1813.03	1797.08	1814.22	1702.22	1774.15	1777.16	1700.29	1777.2	1777.07	1703.13	1796.25
16	1778.34	1774.3	1814.28	1700.31	1760.32	1722.24	1814.28	1761.25	1813.36	1796.26	1722.25	1796.29	1724.33	1796.22	1760.24	1777.25	1777.32	1796.15	1701.2	1738.28	1815.22	1814.09	1703.09	1798.24	1700.22	1760.08	1798.13	1850.24	1703.21	1798.07	1777.14	1701.25
17	1797.35	1814.28	1778.28	1777.32	1774.34	1774.27	1778.28	1701.3	1741.32	1778.23	1760.24	1778.26	1776.35	1777.23	1815.24	1798.23	1815.31	957.627	1778.13	1703.3	1700.2	1778.08	1815.06	1777.22	1796.21	1702.11	1739.14	1834.28	1797.2	1796.08	1723.1	1798.23
18	1741.32	1722.27	1775.32	1799.3	1724.33	1700.26	1703.28	1815.26	1775.39	1722.24	1815.24	1815.26	1815.34	1722.21	1796.26	1815.24	1813.31	1834.15	1700.17	1722.29	1850.21	1390.83	1798.07	1723.21	1797.2	1775.16	1814.15	1723.25	1796.21	1815.06	1741.1	1703.24
19	1799.34	1815.27	1761.27	1722.29	1761.3	1702.25	1796.29	1702.27	1815.32	1797.25	1796.26	1798.27	1723.3	1797.23	1723.24	1796.25	1797.32	1798.13	1703.15	1799.3	1717.25	1483.9	1760.05	1850.2	1724.21	1703.11	1702.17	1797.28	1815.19	1760.05	1778.1	1777.25
20	1796.36	1723.26	1798.27	1760.28	1778.32	1850.22	1867.25	1850.24	1799.34	1717.23	1723.24	1723.25	1778.32	1798.21	1724.24	1722.22	1723.27	1703.14	1761.12	1815.31	1741.18	1777.1	1850.04	1834.28	1815.19	1761.08	1834.14	1738.25	1724.21	1834.07	1760.09	1815.24
21	1798.34	1775.31	1867.25	1702.31	1798.31	1814.25	1761.27	1777.28	1722.34	1798.25	1797.26	1741.24	1798.31	1718.2	1778.25	1834.24	1097.66	1815.13	1834.14	1851.27	1834.23	2433.29	1778.06	1799.25	1761.17	1815.1	1722.13	1703.26	1778.19	1723.05	1761.1	1722.22
22	1722.34	1741.25	1797.27	1815.31	1796.32	1778.24	1797.27	1797.28	1796.36	1815.24	1724.24	1850.25	1761.3	1778.21	1797.26	1778.24	1817.28	622.943	1815.13	1761.28	1402.89	1723.09	1761.07	1760.21	1723.17	1834.11	1761.12	1815.26	1834.22	1722.06	1815.11	1741.21
23	1815.32	1834.26	1815.3	1723.28	1797.32	1815.26	1798.27	1738.25	1798.34	1718.23	1741.23	1760.24	1797.32	1741.19	1741.23	1703.24	599.978	1761.14	1722.13	1760.28	1719.15	1717.11	1723.05	1778.22	1834.22	1778.09	1723.12	1778.26	527.216	1741.05	1867.08	1834.24
24	1723.33	1703.27	1796.29	1761.28	1741.29	1799.24	1775.32	793.006	1724.32	1741.21	2378.62	1761.25	1796.32	1761.21	2408.65	1741.21	2117.52	1722.13	1723.12	1723.28	1723.18	1815.08	1834.07	1717.2	1799.19	1741.08	2099.27	793.006	1722.17	1778.06	1798.11	1778.24
25	2099.47	1850.26	1723.27	1741.27	1799.31	1724.24	1815.3	1799.27	1704.35	1723.23	1761.24	1799.26	1741.29	1815.23	1761.24	1799.24	614.954	1851.11	1741.13	1796.32	1740.17	1670.94	1835.07	1815.21	776.979	1851.07	1703.15	1702.27	1718.17	1761.07	1722.1	1761.23
26	1724.32	1717.25	1724.27	599.999	585.023	1834.24	1724.27	1703.26	1723.33	1851.22	669.401	1717.26	1799.31	1717.18	1718.25	1761.23	957.662	1850.1	1973.18	1834.35	1835.24	1724.07	1741.05	1851.23	527.216	1800.08	1850.11	1777.28	1741.18	1816.08	1850.08	1816.25
27	1851.31	1851.25	1799.26	1834.35	777.033	1741.22	777.018	1814.27	598.004	1834.23	2356.55	1722.25	1837.32	1834.24	2656.76	1850.22	1722.28	637.914	1835.15	1850.27	1818.15	1760.09	1722.06	1718.18	1778.19	1717.06	1741.13	1814.27	1799.19	1718.05	990.588	1850.22
28	1717.33	1724.26	2823.87	1850.27	1673.16	1761.24	2076.39	1724.26	1718.34	1991.28	2045.39	1834.26	1673.16	1724.21	1798.25	2540.66	1445.99	599.95	593.548	1724.29	637.927	2675.41	3044.79	1779.23	1318.82	1835.1	1800.12	1724.26	1762.18	1850.04	1835.12	1718.21
29	1834.4	1761.26	2106.45	1724.29	793.027	1703.24	1994.35	1851.22	1851.31	1244.87	1798.25	577.012	793.027	1800.19	1992.31	1717.21	1724.26	1718.12	599.966	958.689	1777.18	827.484	1800.04	636.939	599.978	1723.08	2538.51	1851.22	600.966	2288.39	1799.08	1731.14
30	1704.35	1799.27	1750.14	1851.27	1723.3	1717.19	1799.26	2076.41	2080.52	2658.79	1717.23	793.009	2080.49	1850.2	2045.39	1914.27	1760.27	1760.12	1800.12	597.987	1854.22	2101.12	1816.08	1340.92	1779.18	1816.1	792.967	777.011	1723.17	1717.04	2680.57	1724.23
31	1718.34	1800.24	2175.57	2000.32	2077.49	1762.22	2656.8	593.586	599.019	792.997	2468.71	599.992	600.011	2481.61	1994.3	756.999	1799.29	614.918	1850.11	629.941	1778.2	2030.17	636.904	1830.25	1558.01	1362.83	584.967	1741.24	1956.24	3044.79	1724.1	2540.66
32	2054.43	597.979	2076.39	614.977	601.015	1362.93	1715.18	1800.23	614.99	1724.21	1685.14	2238.61	777.033	1685.11	1750.13	2431.62	2096.51	635.905	565.521	1741.27	599.964	1348.82	2238.37	622.967	1244.85	637.906	1851.1	600.997	1282.81	1851.04	1750.02	1799.24
33	614.99	1816.27	2231.55	2448.68	2080.49	2696.79	2184.48	1816.27	1800.32	613.949	2408.65	1718.25	585.023	597.963	2425.66	1851.2	1717.27	1873.15	2076.26	599.001	958.63	537.455	1799.06	1816.26	1722.17	600.939	2218.36	790.998	2076.39	1799.06	1836.12	1914.27
34	1956.38	793.01	1994.35	1800.26	1762.3	812.979	791.008	777.011	1834.4	1719.21	1244.88	1756.23	791.019	629.922	2099.39	1782.2	866.62	1836.14	527.22	1717.28	1380.89	1539.89	2342.37	1722.21	2217.53	1782.05	593.548	599.996	934.591	1724.07	1717.08	2640.73
35	1244.95	613.957	1897.3	585.02	1717.27	2798.87	1662.13	585.018	1761.32	1704.23	2375.6	1704.26	2412.71	1956.26	2991.05	1731.14	1834.34	1723.11	1724.14	637.965	1875.23	1325.79	1718.05	635.929	2342.55	1722.08	1483.94	1800.23	790.971	1956.12	2212.35	2238.57
36	1756.31	2167.49	1834.3	1852.28	2087.49	2085.38	2398.62	790.998	593.626	593.579	2439.57	791.003	1643.14	1851.18	2439.57	2164.39	837.588	958.613	584.967	813.008	636.932	2359.3	1362.82	1221.79	1741.18	1724.1	2187.33	635.949	1761.17	2344.39	2057.21	1867.21
37	585.036	1244.9	1762.26	776.541	791.019	1851.2	1488.02	2823.87	1850.33	669.408	812.986	2289.66	731.502	2038.33	1244.88	1816.25	1818.29	2982.39	1483.94	651.945	651.902	813.456	1724.07	600.977	1680.06	614.916	2824.65	583.013	774.989	1476.88	1429.87	790.987
38	659.405	635.95	812.999	593.594	1759.3	792.994	2026.37	1501	1837.35	737.033	893.602	1244.89	2125.46	2185.42	2038.35	1750.12	1741.27	1779.1	792.967	1782.26	1718.17	2035.13	760.951	637.936	2076.39	792.944	2103.29	2080.45	583.977	1800.04	1807.07	1750.12
39	629.958	773.004	585.019	1782.26	1837.32	629.928	1850.26	775.017	1014.7	1799.23	2237.58	2464.7	2280.65	1245.86	2444.68	1500.98	1912.33	1782.12	1571.97	1852.28	1819.17	2076.1	2979.8	1362.92	1800.18	1483.91	1867.12	2076.41	1244.85	1318.74	756.959	1673.11
40	1627.16	2407.65	2162.41	958.689	2412.71	1782.2	3509.37	605.006	600.017	1850.23	1674.1	1963.29	1718.3	1418.92	1914.28	2327.59	637.947	2006.17	1914.14	583.021	1245.83	637.902	1221.69	1719.2	1718.17	1718.07	503.307	2823.87	1558.01	1245.77	1914.11	1244.88
41	1922.4	598.992	1992.34	1704.28	2060.45	2808.84	1693.15	812.993	585.036	1761.23	1864.25	798.014	1956.36	1756.17	2336.58	599.988	790.984	1799.12	2164.27	585.02	2555.76	1918.13	2276.39	2155.43	790.971	2076.22	2161.3	593.586	1779.18	2237.37	2055.17	2056.38
42	583.038	1852.26	1927.32	777.027	1704.31	1419.97	2073.45	1488.01	633.447	864.564	1809.22	2408.65	830.542	1244.86	2214.47	1900.27	1561.07	1724.12	2538.51	757.027	538.47	1952.01	1717.04	620.964	583.977	599.949	598.959	1501	2238.55	1221.69	2468.51	698.415
43	2254.69	593.583	1627.1	1686.19	687.491	635.936	2823.87	1741.24	1671.17	2462.67	1785.17	635.95	1762.3	2237.53	593.59	2054.33	2072.53	1742.11	2824.65	2808.93	1722.2	1677	1244.77	596.961	1762.18	1569.91	943.58	1956.31	2540.67	614.907	2190.31	551.514
44	599.019	2398.63	777.018	599.001	2125.46	790.99	1897.3	600.997	1606.14	2099.39	2190.51	1757.24	1992.39	790.979	845.508	1245.88	1851.27	790.95	1629	777.027	598.951	1824	597.924	1757.19	1956.24	597.935	527.22	2060.41	1461.96	914.519	622.388	1900.27
45	600.017	1712.15	793.013	902.625	614.975	1927.29	1741.26	599.996	1779.32	2214.47	1867.21	629.936	2026.4	792.982	2028.36	597.971	537.472	796.954	1912.15	551.552	2199.63	2398.27	2217.35	812.973	598.966	957.611	1113.68	2554.78	1856.2	622.926	1124.68	1782.2
46	601.025	791.006	2163.46	791.014	2483.75	2012.32	1470.99	2202.55	1685.22	2209.52	2213.49	1867.23	673.457	1693.09	1488	1718.21	1745.22	638.937	2099.27	810.539	1779.23	771.434	2253.33	777.006	1642.04	3044.8	597.954	812.993	2343.54	799.434	2163.22	2464.64
47	2257.68	2170.48	1973.32	2356.64	1718.3	2280.57	812.999	1914.3	774.546	1956.28	2425.66	2050.37	635.968	1837.22	669.401	1673.11	2068.48	775.493	1286.78	1957.35	881.564	1732.97	989.563	1831.26	753.448	1308.74	1835.15	1970.32	2217.53	1641.93	2652.56	501.057
48	1971.41	1836.29	1807.25	1145.79	635.968	2125.37	2577.77	1762.23	2183.62	599.983	2163.41	757.018	1800.29	2808.79	1685.14	2056.38	931.644	1418.9	1676.03	616.305	1895.32	2012.99	598.926	1782.2	1172.74	1615.94	2212.39	944.627	599.978	598.926	2520.55	561.002
49	1837.35	2076.41	791.008	597.987	583.029	1508.03	1807.25	1643.08	2113.56	2808.84	614.957	1837.27	2163.5	2207.44	1900.28	1719.2	1929.37	565.508	790.959	791.014	1243.81	799.445	2305.41	2327.58	2025.32	619.931	803.502	1439.95	1816.2	2057.18	1891.08	2167.47
50	1994.42	1673.11	2645.82	635.959	887.642	637.942	2083.44	2164.45	777.05	1816.25	1952.28	812.994	2483.75	1444.96	2285.56	790.987	840.505	558.947	2069.21	2000.32	1761.16	1845.08	1808.04	2389.62	1891.17	1507.91	954.597	2085.41	957.647	2259.37	1589.95	580.98
51	1685.22	614.964	2099.43	1727.22	1624.12	2202.52	1122.76	636.956	1971.41	1919.31	1067.65	2054.34	1501.03	1059.68	2294.61	1748.15	1482.99	912.528	503.307	1949.37	1799.26	685.405	538.424	599.977	2541.63	2102.23	1799.12	1488.01	2026.29	702.382	2186.25	1958.3
52	1779.32	1801.23	1641.11	601.004	1898.33	2538.68	2106.45	1287.85	2099.47	847.533	1059.7	2862.84	2067.47	2174.5	1963.27	1837.24	593.578	636.921	906.534	763.497	789.506	2239.27	614.907	2476.68	955.611	2409.45	1557.96	503.322	1057.67	2216.35	1925.14	593.581
53	1761.32	622.98	1751.19	629.941	1643.14	621.963	2164.44	1779.24	787.577	1068.65	3507.3	1068.67	1662.17	600.979	1867.21	1858.26	897.573	1903.14	1276.75	1816.31	542.969	2265.28	2116.23	2539.66	2287.58	1351.78	614.937	2540.7	584.975	2284.37	2172.36	1245.88
54	920.663	1685.15	2595.78	1836.31	605.021	1413.94	2483.73	1671.12	2257.68	597.969	1488	600.995	2378.7	2243.55	1864.25	635.935	1784.25	552.445	2755.61	2326.66	1631.96	1722.08	2158.24	2056.39	614.944	1872.11	2825.67	797.01	2016.26	1808.04	1217.73	2060.37
55	2080.52	1963.31	1488.02	651.945	1546.1	1995.31	2081.47	2073.44	2856.05	2557.79	1981.3	2110.47	2212.59	563.347	2288.63	1564.07	2043.49	1731.07	3508.09	2238.65	1448.97	955.577	2358.34	538.466	1850.17	2979.86	1816.14	2107.39	2158.4	774.944	790.947	2438.61
56	1673.18	2684.82	1501.02	637.965	2026.4	1955.29	1852.25	1444.99	629.958	3045.07	1731.17	2014.37	674.458	635.931	1731.17	2567.72	756.995	598.942	1981.18	2429.7	716.447	1761.09	1851.04	564.995	1756.17	2554.57	2076.26	1057.7	2080.38	2304.41	2076.23	1402.94
57	898.636	585.008	2097.45	757.027	2826.95	1956.28	1642.11	598.993	2106.54	1871.24	1898.26	1933.34	593.614	2375.56	2060.42	759.026	1684.14	752.969	1201.74	2521.73	790.963	2021.14	1476.88	1418.94	1851.15	1836.1	1490.92	1126.75	2228.48	1382.82	1244.8	2612.73
58	2220.65	1704.26	1928.29	2645.84	1758.31	2465.68	1171.79	1510.01	1410.99	2538.67	2229.49	2326.63	1704.31	1630.06	2694.78	501.057	664.459	549.37	2161.3	635.959	1757.17	1402.83	2051.16	958.656	593.572	790.938	1571.97	2734.83	1707.14	2217.35	2346.45	2113.44
59	793.044	1782.26	1663.12	2469.71	2280.65	2639.75	2237.6	2069.35	2681.94	1756.2	1984.3	2002.32	2194.57	1757.2	1757.24	614.955	930.626	2308.48	1799.12	1685.17	3023.09	2676.42	1010.57	3007.08	3008.04	1762.08	790.959	2221.61	598.966	827.472	1318.77	1996.33
60	669.444	1779.24	1926.3	775.036	1543.09	3006.1	2108.4	2610.79	623.007	1951.31	2710.77	585.012	2237.66	1985.26	1970.29	1958.3	570.328	2325.47	1100.66	866.615	1837.22	1868.08	1489.88	1981.31	1189.71	759.971	651.894	1710.13	669.406	2538.41	1399.83	2326.58
61	1571.14	2029.38	1741.26	1122.76	1899.34	1458.94	1998.34	1945.31	849.586	1416.94	2037.35	537.483	1115.76	2084.35	839.533	1558.07	2327.69	613.916	600.955	776.541	2698.85	1861.03	2326.38	2107.33	1225.81	1736.03	1855.11	2163.44	1674.08	2342.37	2131.31	614.955
62	791.036	1254.84	1218.83	1835.32	868.568	1751.15	2478.76	1958.34	531.392	1921.29	2372.62	2155.46	2015.38	1463.92	2378.62	2991.07	1746.24	1704.12	1171.7	1970.38	1852.18	845.471	799.434	724.439	1461.96	2630.55	1469.9	605.006	2087.31	2410.41	2496.49	2164.39
63	2809.03	1837.27	2080.45	551.552	1953.36	2045.39	2130.44	2000.3	2004.39	2271.54	3007.08	2738.86	2610.87	1640.06	2026.33	1099.71	1705.2	2414.47	1993.2	1869.31	1908.2	801.46	2212.31	1144.75	1102.68	760.965	2080.31	2412.64	776.979	2611.51	930.581	1002.65
64	702.492	2194.54	1512.03	2199.64	2610.87	1718.22	1624.08	2107.39	1994.42	2682.77	2656.76	2660.8	1816.32	2153.4	2106.43	2052.33	1657.16	542.284	1000.61	793.021	1308.78	2553.35	2400.41	1419.95	1853.22	774.956	2753.64	614.965	1067.63	2263.36	1981.16	1851.2
65	1671.17	1727.19	1624.08	2326.66	1956.36	2081.42	1351.9	2060.41	674.471	821.524	593.59	651.934	601.015	1759.21	2163.41	1547.02	1284.84	1398.84	583.971	699.532	1226.78	1318.74	698.381	1558.04	2222.51	1489.9	2612.56	2164.45	2247.45	1244.77	614.929	599.988
66	1240.88	1512.03	2164.44	1949.37	2175.61	2754.8	2595.78	1609.07	586.419	1040.67	904.6	2420.67	3045.17	1899.24	1816.26	665.405	2314.67	620.939	2365.42	1244.92	2083.43	2024.16	1794.1	792.989	2026.29	598.936	2752.61	2643.79	2864.77	607.396	983.592	1913.26
67	2586.82	1628.09	1998.34	1735.25	2378.7	2530.71	2071.39	1489.02	2341.7	1789.19	1963.27	1800.23	2164.49	514.304	527.253	1956.29	515.307	1649.97	1790.12	1801.26	3054.08	1973.1	1956.12	1422.93	905.545	1447.92	2141.23	1672.13	592.389	1202.67	1282.76	565.547
68	787.577	1795.27	1956.31	2209.58	829.523	1720.19	1674.13	1852.25	2097.54	1725.23	889.513	2210.58	1627.13	896.568	1237.82	637.941	1822.24	792.957	905.527	614.977	1482.96	2043.3	1546.9	1756.17	537.469	1683.97	1724.14	775.017	1756.17	2570.52	1800.09	1022.67
69	2030.44	2737.83	1933.33	865.644	1858.32	2681.8	2825.88	3509.38	1043.74	1348.91	2212.49	2114.49	1118.77	1809.18	2190.51	2464.64	1166.76	1109.66	598.959	1735.25	2236.57	1218.72	1817.06	1741.18	1419.96	1225.75	2057.23	2125.41	1748.1	1835.07	2826.62	2345.6
70	636.449	2038.35	1748.17	2734.89	581.002	1247.82	2099.43	2514.71	636.987	2262.59	1558.09	1893.28	599.008	1624.04	1748.16	2057.36	2433.7	2694.59	1832.15	623.407	1069.66	2209.26	1300.71	598.972	990.62	2172.34	934.564	1558.08	1312.8	1831.13	593.545	1719.2
71	2304.72	2162.4	1212.82	1712.18	2252.6	1756.2	2777.98	797.01	2062.5	622.973	1718.25	2211.55	2069.39	1643.06	2327.6	1489	2076.52	776.961	2597.56	2211.6	792.972	957.613	1832.11	2980.08	1471.95	1628.96	1038.62	2202.55	1759.18	2373.35	2155.28	1800.21
72	1330.95	2261.62	2143.43	813.008	1711.18	1832.29	1687.14	1668.12	2252.62	1564.06	2637.73	1505.04	2250.56	1871.23	2164.41	1643.08	1850.26	2417.54	589.349	2288.69	2318.66	790.938	823.495	866.589	1335.85	2025.2	1599.97	613.954	2458.55	582.948	1918.14	1965.27
73	637.985	1835.31	1225.86	930.663	2653.88	1855.22	1558.1	1911.31	635.985	1691.11	599.995	2260.61	2006.39	2273.53	1717.23	585.004	551.534	648.388	2436.48	1684.17	1911.27	1646.97	677.375	1148.75	1287.79	1318.75	1676.03	1914.3	573.347	2168.3	2063.28	1243.84
74	525.361	580.989	2337.62	2143.44	1880.31	1138.73	1685.15	1558.08	583.038	1825.21	2214.47	561.01	1431.01	1891.2	1785.17	600.986	1611.07	1827.1	1124.69	593.594	1284.81	2014.09	2272.33	2267.53	1490.96	1811.06	1443.9	1816.27	1802.14	1684.97	1968.14	812.979
75	1560.13	865.633	2045.42	1244.92	1913.32	1402.94	1933.33	1980.34	798.557	2065.35	1800.23	1191.78	1850.3	1900.25	1997.32	2356.54	1840.27	756.96	2837.67	1905.33	622.959	1908.08	2200.35	1244.87	2249.43	3095.79	1001.62	1414.94	1007.64	1794.1	849.495	1489
76	1473.05	1189.77	2194.52	1673.15	2438.68	2026.33	1627.1	1131.77	2124.49	2068.31	2029.35	1852.23	931.687	821.506	1927.29	2462.61	1624.08	717.444	1662	659.398	929.624	2085.17	1958.14	523.432	542.981	2116.25	1939.14	2612.77	3023.02	2025.18	2689.58	2697.8
77	777.05	1373.94	1727.18	622.988	1750.17	2483.66	2175.57	2170.46	2661.93	2240.58	1807.22	2538.7	1912.33	1067.62	2419.63	2060.37	558.969	2306.51	2392.42	683.476	2799.91	582.356	1818.07	1151.73	597.962	1926.13	2219.4	1609.07	664.435	2122.23	832.485	1642.08
78	2026.42	2026.35	1662.13	2460.72	813.009	669.395	1321.86	1244.89	575.403	2356.56	2285.56	775.026	2426.73	1807.19	2628.79	1835.25	1077.67	2171.39	1312.78	731.505	1483.97	1467.87	2538.41	901.607	1580.98	2824.6	1102.66	2024.42	3044.94	2155.22	1255.73	2244.54
79	2170.56	1671.1	2250.53	583.021	990.673	2141.35	2005.35	1219.82	2144.5	3009.08	1615.06	2327.64	2414.68	2498.65	2083.4	1730.14	2411.74	845.487	2150.3	805.544	1318.8	2349.26	1807.04	2000.28	1816.2	620.933	929.62	1668.12	1606.02	928.525	1402.85	2554.73
80	512.071	1656.15	1855.25	960.659	1112.75	1643.07	793.013	2024.42	2304.72	1495.92	1908.28	829.517	1967.39	2164.37	1762.22	1887.22	1056.69	1208.73	1282.78	1742.25	1282.8	1288.74	2980.79	790.984	1602.03	2333.37	2172.37	1065.7	1102.68	876.512	1681	3017.02
81	1852.31	2184.47	1387.93	1671.13	1865.3	599.986	2211.55	1673.12	2054.43	871.564	1671.11	2030.39	2862.92	2083.35	518.299	1244.88	1785.25	1755.1	1411.85	1358.97	1444.95	1284.76	1227.72	1222.81	1157.72	1752	2647.64	2414.63	1560.01	1697.97	2039.31	635.935
82	713.491	1340.94	1559.09	2681.86	1816.32	1998.31	1808.24	2826.89	554.381	600.987	715.447	2425.65	2672.87	1118.71	2777.94	613.944	929.641	1861.09	651.894	2075.44	1336.81	1770.97	2303.41	597.961	948.594	1756.07	1180.71	1483.02	1704.2	755.424	2210.38	2131.45
83	1606.14	1762.23	1577.05	793.021	2107.44	2662.79	2250.53	2175.58	2462.79	1779.23	2172.51	856.557	581.002	2661.73	2231.52	2640.73	998.631	2847.67	1824.09	2054.37	1244.84	920.549	580.936	2016.28	2825.77	2185.29	1629	619.395	2359.54	1354.79	533.326	1952.28
84	1885.33	1892.3	3509.37	1685.17	1712.19	1984.29	1731.18	1710.13	2826.99	1460.96	2410.65	869.568	1759.3	1022.65	757.012	1597.03	2268.66	560.966	2037.19	1704.28	912.552	748.466	715.387	1199.81	1856.2	2688.58	2070.21	598.993	1482.96	1988.12	882.538	1500.98
85	1981.41	2254.6	2028.37	1900.31	2023.41	1816.24	601.007	2640.76	601.025	2303.64	1818.26	1524.03	2038.44	871.55	2092.42	2211.52	1322.86	911.504	1351.8	1171.8	1553.94	1511.91	1977.12	1402.92	2335.52	542.952	1060.67	2006.35	2570.7	2239.37	2086.22	2637.74
86	2169.6	2402.63	2412.61	659.398	1363.97	1629.09	1834.3	2125.41	687.504	3007.08	2414.6	2244.55	648.417	3507.26	2130.43	3509.33	1865.33	1507.92	1782.1	1855.27	1961.33	2750.43	613.898	738.523	2389.62	651.877	565.521	1122.75	2628.75	2314.35	1021.6	2468.68
87	2076.53	2743.8	2483.73	1284.89	597.996	2076.37	1855.25	2088.35	1909.33	1685.13	1597.04	1719.23	514.334	501.053	2710.77	1758.22	1492.97	630.387	2752.61	2440.72	1362.89	1530.88	1225.73	1445.97	1357.86	1670.98	1824.09	1806.22	660.391	2238.37	1171.69	600.986
88	757.538	673.45	1341.93	797.024	2231.61	967.623	1880.26	1861.25	2412.76	792.513	2327.6	1582.06	660.432	1914.24	1756.21	1762.21	1727.23	837.545	732.459	1574.07	894.603	810.473	1291.73	2475.64	2359.54	1855.07	1804.12	1112.73	743.456	1309.74	2304.44	2609.77
89	1531.07	512.047	2607.82	2099.43	1967.39	2164.4	1226.87	1338.89	2279.69	923.584	2431.63	3041.12	997.672	1092.71	1837.26	920.61	1484.03	1837.12	2191.3	760.54	848.519	2017.05	1326.73	584.993	1120.7	1543.91	2227.4	2483.7	635.922	1782.03	2112.27	1287.85
90	2252.62	1008.67	1274.84	1905.33	636.972	1388.91	565.567	2013.33	577.408	1362.93	1242.83	1945.29	917.656	1736.17	613.955	2288.61	525.343	1082.65	842.505	1198.82	1874.24	565.497	1509.88	1631	844.521	806.46	1755.09	1998.34	698.425	2662.55	2326.42	2189.5
91	633.447	1961.33	2184.48	1171.8	1305.89	1512.98	2225.54	2082.44	3057.31	1613.07	1874.28	757.504	1629.14	2280.54	2610.78	2429.59	1713.19	1029.57	1244.82	1713.2	669.415	889.466	2514.44	931.647	1873.22	1779.07	1782.1	1852.25	2253.51	2279.39	1608.95	608.386
92	657.439	1660.11	2384.65	957.702	1431.01	1846.24	2125.42	2426.63	672.477	1886.23	1956.29	1835.29	2107.44	800.503	1171.78	2514.68	1557.04	1872.17	2172.37	2322.69	1416.88	614.909	1125.64	2128.47	1325.85	2631.55	2513.54	2639.79	1527.01	707.383	2184.27	775.007
93	904.656	1073.7	1735.25	669.429	2623.86	2735.78	757.02	1303.88	1750.19	2823.83	1782.23	2060.42	637.389	2417.57	2131.44	1287.85	584.983	749.471	2444.5	558.392	2307.68	1791	1830.1	2238.57	1751.11	1632.94	2365.42	636.956	1543.99	797.455	1072.65	1981.3
94	593.626	1199.83	597.994	1658.14	2184.53	2283.56	1856.29	503.322	1818.33	1672.1	1217.82	1381.95	2076.46	636.937	1624.06	1647.07	1486.01	1399.85	2554.55	584.023	600.957	1503.89	637.895	2356.56	1522.97	621.925	2150.3	2408.67	998.624	1497.85	527.208	1285.84
95	1850.33	2209.56	2110.46	1839.28	1940.33	501.063	2060.43	1742.22	1084.77	598.983	775.015	1574.04	2232.61	2614.7	1647.1	621.966	2313.68	1741.11	1228.74	814.572	1270.79	1726.97	797.455	1958.29	929.625	1949.15	879.548	1765.2	1222.75	2064.21	792.458	1956.29
96	1641.15	621.977	2612.76	1699.16	1540.07	811.51	1849.24	614.965	746.506	1483.99	1824.21	1679.1	2826.95	2121.35	3047.04	1382.93	1606.09	1441.88	614.937	1411.98	2150.52	930.578	832.467	2524.67	1836.2	2458.43	2640.59	804.543	1719.15	2845.56	890.475	921.592
97	609.4	2524.74	2865.87	2075.44	2340.64	1446.94	2317.6	760.526	1023.71	1864.25	2038.35	1707.17	1712.19	2256.49	2357.57	1545.01	2193.57	2085.24	2212.39	1758.29	1166.73	848.489	1364.8	1880.24	774.989	583.955	1068.59	1535.01	1805.19	1498.88	2354.42	1363.93
98	1644.17	1004.66	1508.06	1755.23	599.008	1890.22	1528.06	2021.37	1205.84	717.456	2608.79	2384.65	1706.23	2333.56	1965.27	1339.88	1991.39	753.431	731.46	1827.26	941.587	1367.76	2351.38	1807.24	1750.08	1172.68	1429.9	1730.16	1873.22	2243.37	639.363	560.357
99	2856.05	2698.84	759.044	763.497	1629.14	2024.39	1752.2	2157.5	2081.55	2084.38	2824.83	2076.4	1399.95	1329.87	599.995	1462.96	724.432	1846.11	794.475	1898.32	1827.15	2211.26	2706.55	760.019	1771.08	2994.82	1672.02	1418.97	2128.37	2341.36	1003.58	1227.82
100	2113.56	1428.96	600.003	1751.21	1756.27	584.01	1845.29	2412.64	1653.14	2237.58	1068.67	1438.96	2325.68	812.966	2237.58	593.581	600.974	1328.79	1110.66	1963.33	2533.76	2523.47	790.926	2627.77	2213.48	1763.08	1913.14	2755.84	2267.5	1779.05	659.354	2095.4

## Sheet: TOP100_P_BI_(SupFig_7C)
Rank	The 1th supervised testing	The 2th supervised testing	The 3th supervised testing	The 4th supervised testing	The 5th supervised testing	The 6th supervised testing	The 7th supervised testing	The 8th supervised testing	The 9th supervised testing	The 10th supervised testing	The 11th supervised testing	The 12th supervised testing	The 13th supervised testing	The 14th supervised testing	The 15th supervised testing	The 16th supervised testing	The 17th supervised testing	The 18th supervised testing	The 19th supervised testing	The 20th supervised testing	The 21th supervised testing	The 22th supervised testing	The 23th supervised testing	The 24th supervised testing	The 25th supervised testing	The 26th supervised testing	The 27th supervised testing	The 28th supervised testing	The 29th supervised testing	The 30th supervised testing	The 31th supervised testing	The 32th supervised testing
1	1700.37	1738.27	1738.27	1812.3	1740.31	1740.22	1738.27	1739.24	1700.37	1812.25	1740.25	1812.27	1740.31	1740.2	1740.25	1812.25	1738.28	1700.15	1776.18	1812.3	1812.19	1812.07	1812.07	1812.23	1812.21	1813.11	1776.18	1739.24	1812.21	1812.07	1776.15	1812.25
2	1701.39	1700.29	1739.27	1776.33	1812.33	1739.23	1739.27	1776.3	1701.39	1700.26	1812.27	1774.3	1812.33	1812.22	1812.27	1775.27	1812.31	1813.13	1700.17	1776.33	1738.22	1774.14	1776.11	1774.24	1738.19	1700.12	1700.17	1776.3	1738.19	1776.11	1812.12	1775.27
3	1702.37	1701.31	1740.28	1700.31	1700.34	1738.24	1740.28	1812.27	1702.37	1738.24	1774.29	1775.3	1700.34	1813.22	1774.29	1774.28	1700.3	1738.13	1738.14	1700.31	1797.25	1813.03	1813.07	1775.24	1776.23	1776.14	1738.14	1812.27	1776.23	1813.07	1774.16	1774.28
4	1738.34	1702.29	1777.31	1738.28	1701.37	1777.26	1777.31	1740.25	1738.34	1774.27	1700.29	1776.29	1701.37	1774.25	1700.29	1776.27	1701.32	1776.17	1740.15	1738.28	1813.19	1775.14	1774.12	1740.21	1740.2	1740.09	1740.15	1740.25	1740.2	1774.12	1813.12	1776.27
5	1812.36	1739.26	1776.32	1739.29	1702.34	1813.25	1776.32	1775.29	1812.36	1701.26	1738.25	1700.28	1702.34	1775.24	1738.25	1740.22	1702.32	1812.13	1812.15	1739.29	1700.2	1776.11	1775.13	1813.23	1700.22	1812.1	1812.15	1775.29	1700.22	1775.13	1738.12	1740.22
6	1703.35	1777.29	1700.32	1701.33	1738.31	1700.26	1700.32	1813.27	1703.35	1702.26	1739.24	1702.28	1738.31	1776.25	1739.24	1702.25	1776.31	1701.18	1813.15	1701.33	1701.22	1796.1	1701.11	1700.23	1703.21	1774.15	1813.15	1813.27	1703.21	1701.11	1775.16	1702.25
7	1740.35	1813.27	1701.33	1702.31	1739.3	1701.28	1701.33	1703.26	1740.35	1739.22	1775.3	1738.25	1739.3	1739.2	1775.3	1813.24	1777.32	1774.18	1739.14	1702.31	1776.21	1700.08	1738.07	1702.24	1813.21	1738.1	1739.14	1703.26	1813.21	1738.07	1701.16	1813.24
8	1777.36	1740.27	1702.31	1740.3	1776.35	1776.28	1702.31	1738.25	1777.36	1740.23	1776.29	1814.27	1776.35	1738.21	1776.29	1739.21	1740.3	1739.14	1774.19	1740.3	1740.17	1701.13	1700.1	1739.2	1775.26	1701.14	1774.19	1738.25	1775.26	1700.1	1740.11	1739.21
9	1776.37	1776.3	1760.26	1775.34	1703.32	1774.27	1760.26	1741.24	1776.37	1813.24	1701.28	1701.28	1703.32	1814.22	1701.28	1814.24	1814.31	1740.13	1701.2	1775.34	1775.27	1738.1	1740.05	1776.24	1777.2	1775.16	1701.2	1741.24	1777.2	1740.05	1700.15	1814.24
10	1814.35	1812.27	1812.29	1777.32	1777.33	1775.27	1812.29	1761.25	1814.35	1775.28	1702.28	1739.25	1777.33	1700.24	1702.28	1701.25	1703.3	1702.16	1775.2	1777.32	1777.18	1739.09	1702.1	1701.23	1797.2	1777.11	1775.2	1761.25	1797.2	1702.1	1702.15	1701.25
11	1739.34	1774.3	1703.28	1813.29	1814.32	1703.24	1703.28	1774.3	1739.34	1776.26	1814.25	1740.26	1814.32	1702.23	1814.25	1738.23	1774.33	1777.15	1777.16	1813.29	1739.18	1740.04	1739.07	1738.21	1814.21	1798.09	1777.16	1774.3	1814.21	1739.07	1739.12	1738.23
12	1774.37	1775.31	1775.32	1814.31	1775.36	1760.23	1775.32	1700.29	1774.37	1814.25	1813.26	1813.26	1775.36	1701.24	1813.26	1703.24	1813.31	1775.19	1702.17	1814.31	1774.32	1814.09	1814.09	1814.22	1701.24	1797.11	1702.17	1700.29	1701.24	1814.09	1814.12	1703.24
13	1775.39	1760.26	1774.31	1797.31	1813.33	1812.25	1774.31	1777.28	1775.39	1777.25	1777.28	1796.29	1813.33	1703.22	1777.28	1700.26	1775.36	1797.16	1703.15	1797.31	1814.24	1702.13	1796.08	1796.24	1739.19	1739.1	1703.15	1777.28	1739.19	1796.08	1796.13	1700.26
14	1813.36	1814.28	1813.29	1798.3	1774.34	1814.25	1813.29	1797.28	1813.36	1796.26	1703.26	1777.27	1774.34	1777.23	1703.26	1741.21	1797.32	1798.13	1760.14	1798.3	1702.25	1797.12	1741.05	1797.25	1774.24	1703.11	1760.14	1797.28	1774.24	1741.05	1703.13	1741.21
15	1723.33	1797.27	1814.28	1774.33	1761.3	1702.25	1814.28	1701.3	1723.33	1778.23	1722.25	1778.26	1761.3	1797.23	1722.25	1777.25	1739.28	1760.12	1797.14	1774.33	1703.21	1760.09	1703.09	1703.24	1702.22	1760.08	1797.14	1701.3	1702.22	1703.09	1777.14	1777.25
16	1797.35	1798.27	1722.28	1796.32	1722.31	1798.23	1722.28	1798.25	1797.35	1797.25	1815.24	1797.29	1722.31	1796.22	1815.24	1722.22	1796.33	1796.15	1723.12	1796.32	1796.26	1778.08	1797.08	1777.22	1741.18	1741.08	1723.12	1798.25	1741.18	1797.08	1778.1	1722.22
17	1778.34	1703.27	1797.27	1778.29	1723.3	1797.25	1797.27	1760.25	1778.34	1703.25	1760.24	1703.27	1723.3	1722.21	1760.24	1797.26	1798.3	1814.16	1796.15	1778.29	1798.23	1703.11	1760.05	1778.22	1798.19	1723.08	1796.15	1760.25	1798.19	1760.05	1797.12	1797.26
18	1796.36	1796.29	791.535	1703.3	1797.32	1761.24	791.535	1814.27	1796.36	1760.22	1778.25	1815.26	1797.32	1741.19	1778.25	1796.25	1778.29	1723.11	1798.13	1703.3	1815.22	1777.1	1777.07	1718.18	1761.17	1834.11	1798.13	1814.27	1761.17	1777.07	1722.1	1796.25
19	1798.34	1778.27	1798.27	1760.28	1815.34	1722.24	1798.27	1723.25	1798.34	1815.24	1796.26	1722.25	1815.34	1760.2	1796.26	1815.24	1815.31	1778.12	1814.15	1760.28	1799.26	1723.09	1798.07	1798.24	1815.19	1702.11	1814.15	1723.25	1815.19	1798.07	1741.1	1815.24
20	1815.32	1723.26	1723.27	1723.28	1798.31	1723.23	1723.27	1796.28	1815.32	1722.24	1797.26	1723.25	1798.31	1761.21	1797.26	1798.23	1723.27	1703.14	1741.13	1723.28	1760.18	1815.08	1723.05	1760.21	1778.19	1761.08	1741.13	1796.28	1778.19	1723.05	1723.1	1798.23
21	1760.34	1722.27	1778.28	1799.3	1760.32	1796.25	1778.28	1702.27	1760.34	1723.23	790.506	1760.24	1760.32	1778.21	790.506	1723.22	584.983	1834.15	1761.12	1799.3	1741.18	1741.04	1815.06	1722.21	1723.17	1796.11	1761.12	1702.27	1723.17	1815.06	1760.09	1723.22
22	1722.34	1815.27	791.008	1741.27	1741.29	1741.22	791.008	1722.25	1722.34	1798.25	791.523	1741.24	1741.29	1798.21	791.523	1778.24	585.372	1761.14	1722.13	1741.27	1778.2	1798.09	1722.06	1815.21	1796.21	1814.12	1722.13	1722.25	1796.21	1722.06	1815.11	1778.24
23	585.036	1761.26	1761.27	1761.28	1796.32	1834.24	1761.27	1778.26	585.036	1718.23	1723.24	1798.27	1796.32	1723.2	1723.24	1761.23	1741.27	1850.1	1778.13	1761.28	1723.18	1835.03	1778.06	1723.21	1722.17	1850.07	1778.13	1778.26	1722.17	1778.06	1798.11	1761.23
24	880.622	1741.25	1815.3	1815.31	2164.49	1778.24	1815.3	1799.27	880.622	858.562	1741.23	1244.89	2164.49	1815.23	1741.23	1760.22	1760.27	1741.11	585.346	1815.31	1834.23	1722.08	1835.07	1741.18	1760.21	1835.1	585.346	1799.27	1760.21	1835.07	1761.1	1760.22
25	2081.55	593.583	1796.29	791.014	593.614	1815.26	1796.29	1834.28	2081.55	1244.87	1747.17	1761.25	593.614	2008.3	1747.17	1558.07	1722.28	1835.17	584.967	791.014	1835.24	1799.07	1834.07	1761.22	1799.19	1722.08	584.967	1834.28	1799.19	1834.07	2172.36	1558.07
26	593.626	791.532	593.594	1722.29	2478.82	593.573	593.594	593.586	593.626	1968.29	1971.31	791.003	2478.82	2164.37	1971.31	775.007	1799.29	1815.13	1815.13	1722.29	1851.22	1850.01	1850.04	1835.25	584.975	1815.1	1815.13	593.586	584.975	1850.04	790.47	775.007
27	791.564	790.517	2824.86	614.977	1778.32	2164.4	2824.86	1815.26	791.564	2065.35	2008.33	791.529	1778.32	1724.21	2008.33	1724.23	1850.26	1799.12	1850.11	614.977	1718.17	2540.37	1761.07	1717.2	585.356	1816.1	1850.11	1815.26	585.356	1761.07	1850.08	1724.23
28	1761.32	791.006	1741.26	791.542	1956.36	790.99	1741.26	1816.27	1761.32	2752.8	2022.37	1799.26	1956.36	790.979	2022.37	2164.39	1761.27	1722.13	2824.65	791.542	1850.21	1717.11	1717.04	1834.28	1834.22	1778.09	2824.65	1816.27	1834.22	1717.04	1724.1	2164.39
29	1994.42	2069.36	2539.7	593.594	2826.95	1724.24	2539.7	775.017	1994.42	1741.21	2184.45	2037.36	2826.95	1718.2	2184.45	1244.88	1956.35	1836.14	2164.27	593.594	1761.16	2238.31	1718.05	1851.23	1724.21	1800.08	2164.27	775.017	1724.21	1718.05	2174.37	1244.88
30	600.017	614.964	2164.44	585.398	585.023	791.515	2164.44	1850.24	600.017	1717.23	2189.5	790.52	585.023	1244.86	2189.5	2076.38	583.983	1779.1	1799.12	585.398	1722.2	2065.13	1724.07	2980.08	1956.24	1799.09	1799.12	1850.24	1956.24	1724.07	1748.03	2076.38
31	600.44	1852.26	614.972	599.001	585.393	1816.24	614.972	790.998	600.44	2023.4	2084.4	2065.39	585.393	1717.18	2084.4	790.987	614.954	1851.11	1834.14	599.001	1717.25	2185.18	2326.38	1244.87	593.572	1836.1	1834.14	790.998	593.572	2326.38	2184.27	790.987
32	1956.38	615.4	790.515	599.423	775.039	2083.38	790.515	2823.87	1956.38	790.508	1715.15	585.39	775.039	2084.35	1715.15	1851.2	790.511	1873.15	790.959	599.423	1816.23	1834.06	1851.04	1799.25	1816.2	1724.1	790.959	2823.87	1816.2	1851.04	584.96	1851.2
33	791.036	597.979	2533.8	601.004	1807.29	1800.21	2533.8	1800.23	791.036	791.518	1748.16	584.012	1807.29	2023.33	1748.16	2540.66	1851.27	579.42	1836.15	601.004	1873.31	1244.76	1340.81	1850.2	1851.15	1851.07	1836.15	1800.23	1851.15	1340.81	585.339	2540.66
34	1741.32	1718.26	775.025	601.41	880.592	583.006	775.025	614.965	1741.32	790.994	1807.22	585.012	880.592	2539.63	1807.22	1807.21	1717.27	614.918	593.548	601.41	958.63	1718.08	2540.43	1508.99	1850.17	1340.81	593.548	614.965	1850.17	2540.43	2164.24	1807.21
35	598.004	1799.27	2449.69	2824.91	791.019	790.505	2449.69	923.593	598.004	2084.38	2076.38	1717.26	791.019	1834.24	2076.38	2008.33	958.647	615.36	1835.15	2824.91	1724.19	858.511	2327.37	3045.08	2326.54	1717.06	1835.15	923.593	2326.54	2327.37	1038.61	2008.33
36	598.401	1779.24	2076.39	585.02	791.547	1837.24	2076.39	791.526	598.401	2076.36	2181.43	598.992	791.547	792.489	2181.43	2326.58	1873.34	1852.12	614.937	585.02	3047.03	1761.09	3044.79	1737.18	1835.2	2164.21	614.937	791.526	1835.2	3044.79	2326.42	2326.58
37	2035.44	1782.26	585.019	2823.91	1054.72	614.951	585.019	2824.86	2035.44	2022.38	2243.56	2165.41	1054.72	1855.18	2243.56	1717.21	598.971	1717.13	1038.62	2823.91	957.643	1851.09	1800.04	615.396	1800.18	1719.07	1038.62	2824.86	1800.18	1800.04	2166.29	1717.21
38	790.547	2164.42	1328.89	584.023	1615.11	1558.06	1328.89	601.4	790.547	1761.23	1761.24	879.592	1615.11	2083.35	1761.24	1834.24	599.395	1911.17	600.955	584.023	1719.15	2326.3	1816.08	1724.19	2164.35	614.916	600.955	601.4	2164.35	1816.08	1244.8	1834.24
39	2411.78	1834.26	2595.78	579.437	1747.25	1718.22	2595.78	2164.45	2411.78	593.579	2190.51	915.644	1747.25	2540.62	2190.51	791.513	2238.71	1719.1	601.362	579.437	1779.23	2327.3	1831.13	614.95	1676.09	615.358	601.362	2164.45	1676.09	1831.13	1835.12	791.513
40	2856.05	1717.25	2145.41	600.424	1837.32	1850.22	2145.41	600.997	2856.05	792.997	829.503	601.405	1837.32	1558.05	829.503	790.509	790.984	852.498	1724.14	600.424	1956.27	2596.38	1836.07	1759.18	2184.38	853.488	1724.14	600.997	2184.38	1836.07	1715.01	790.509
41	614.99	598.386	880.573	1834.35	1676.19	1717.19	880.573	1558.08	614.99	1724.21	1244.88	593.591	1676.19	2065.33	1244.88	1759.23	1724.26	853.504	790.48	1834.35	3023.09	2288.34	1799.06	1623.03	2540.67	1718.07	790.48	1558.08	2540.67	1799.06	2327.46	1759.23
42	1968.39	879.587	1158.78	1850.27	1900.36	2099.39	1158.78	583.013	1968.39	1508.99	2626.82	599.413	1900.36	1728.12	2626.82	1799.24	1816.3	1724.12	1800.12	1850.27	3045.06	2343.3	2065.18	3007.08	2838.8	1873.1	1800.12	583.013	2838.8	2065.18	1855.09	1799.24
43	1724.32	2755.86	2099.43	615.411	2184.53	600.408	2099.43	2069.35	1724.32	622.973	2023.37	812.526	2184.53	1956.26	2023.37	1966.27	1344.84	1816.14	1091.67	615.411	614.929	3007.73	2288.39	2326.6	2287.58	1956.13	1091.67	2069.35	2287.58	2288.39	2210.38	1966.27
44	2076.53	1956.3	2826.88	1782.26	1558.14	1799.24	2826.88	585.381	2076.53	623.394	2145.39	614.969	1558.14	1759.21	2145.39	2237.57	1835.32	1718.12	1956.18	1782.26	615.374	2289.31	2287.4	565.54	1340.87	1779.07	1956.18	585.381	1340.87	2287.4	2287.46	2237.57
45	2178.48	621.429	597.994	866.615	2163.5	615.39	597.994	2826.89	2178.48	2069.33	2164.41	599.992	2163.5	2099.36	2164.41	593.581	2287.73	851.495	791.483	866.615	1836.28	1836.11	3006.8	593.572	1704.2	1852.1	791.483	2826.89	1704.2	3006.8	2211.34	593.581
46	2579.87	880.591	598.379	879.601	1715.22	1762.22	598.379	1851.22	2579.87	2469.62	2170.44	600.414	1715.22	1842.18	2170.44	601.395	593.578	1949.18	2123.24	879.601	1818.15	2538.35	2539.43	824.54	1717.15	1399.8	2123.24	1851.22	1717.15	2539.43	791.469	601.395
47	2243.66	579.429	669.41	2164.45	2411.73	1956.28	669.41	2237.59	2243.66	879.578	1615.06	1627.09	2411.73	2524.63	1615.06	585.37	1102.71	1800.09	3006.88	2164.45	2326.64	615.354	1244.77	2065.36	614.944	584.946	3006.88	2237.59	614.944	1244.77	1717.08	585.37
48	2478.86	2070.34	1724.27	1836.31	1724.33	2069.32	1724.27	1724.26	2478.86	1558.06	1051.67	2020.32	1724.33	774.998	1051.67	829.495	2177.6	1782.12	1748.05	1836.31	3006.12	1831.13	1759.06	1956.27	1727.14	1015.61	1748.05	1724.26	1727.14	1759.06	2288.44	829.495
49	1671.17	2681.82	1748.17	1852.28	2525.79	1704.22	1748.17	866.595	1671.17	1785.16	1798.25	1509.02	2525.79	791.503	1798.25	2184.43	599.978	548.381	2326.45	1852.28	824.54	1873.11	2343.36	601.395	1748.1	1890.08	2326.45	866.595	1748.1	2343.36	1051.6	2184.43
50	2513.81	561.017	2162.41	1800.26	1881.3	1852.23	2162.41	1140.8	2513.81	1799.23	2099.39	2326.63	1881.3	2076.35	2099.39	2823.83	600.398	598.942	1119.68	1800.26	1340.86	790.468	1855.06	1298.82	2238.55	2539.45	1119.68	1140.8	2238.55	1855.06	1125.67	2823.83
51	879.623	2099.39	2626.86	599.999	2076.46	2539.67	2626.86	1836.26	879.623	846.532	2478.73	551.539	2076.46	593.57	2478.73	600.986	1834.34	599.37	2099.27	599.999	2237.66	1340.83	1507.87	2325.6	1715.12	2237.4	2099.27	1836.26	1715.12	1507.87	2185.28	600.986
52	2082.52	2076.41	2282.59	880.6	2539.76	561.011	2282.59	1164.79	2082.52	2808.84	2667.73	600.995	2539.76	1613.05	2667.73	1201.8	2411.74	1854.15	1102.66	880.6	2305.68	1719.03	2432.43	579.412	3007.03	2663.56	1102.66	1164.79	3007.03	2432.43	1283.77	1201.8
53	599.019	600.997	2823.87	1133.78	1240.85	597.972	2823.87	2364.62	599.019	551.53	2132.42	1850.25	1240.85	1952.26	2132.42	1509	908.588	1956.16	1171.7	1133.78	2306.67	1724.07	2237.37	580.406	1758.18	3006.83	1171.7	2364.62	1758.18	2237.37	1807.07	1509
54	1097.76	1724.26	1628.1	1816.31	583.029	598.369	1628.1	1720.2	1097.76	1689.13	2171.48	2023.42	583.029	2171.48	2171.48	2826.85	1719.24	2164.25	1351.8	1816.31	853.519	2539.36	1399.8	2023.37	1249.77	1782.05	1351.8	1720.2	1249.77	1399.8	2065.21	2826.85
55	599.44	599.99	1762.26	790.529	1293.89	1728.14	1762.26	1762.23	599.44	1956.28	1689.14	615.405	1293.89	2469.58	1689.14	1612.06	1038.66	600.378	2076.26	790.529	1704.19	824.502	2331.38	970.641	1471.95	3005.85	2076.26	1762.23	1471.95	2331.38	2163.22	1612.06
56	601.025	601.403	2526.68	894.626	1673.16	2540.66	2526.68	615.402	601.025	801.514	2174.54	793.009	1673.16	1749.12	2174.54	1727.16	1779.28	584.956	2172.37	894.626	1756.15	1800.05	2342.37	2288.61	1598.01	1949.15	2172.37	615.402	1598.01	2342.37	790.947	1727.16
57	601.43	1968.31	2612.76	1835.32	1748.21	1330.89	2612.76	1837.26	601.43	871.564	1709.14	829.517	1748.21	2232.49	1709.14	2065.35	2170.55	585.347	866.575	1835.32	2432.68	614.909	824.481	2327.58	957.647	1758.07	866.575	1837.26	957.647	824.481	1956.15	2065.35
58	551.582	2112.47	601.007	2306.7	1966.35	866.574	601.007	1954.32	551.582	2185.46	1893.27	1718.25	1966.35	2478.68	1893.27	1747.17	600.974	1340.84	583.971	2306.7	584.966	1783	2164.2	2342.59	1836.2	3050.84	583.971	1954.32	1836.2	2164.2	1092.67	1747.17
59	2022.45	1069.71	601.403	1332.91	2170.52	1141.78	601.403	2384.64	2022.45	1737.17	2018.33	2325.64	2170.52	2525.65	2018.33	2327.59	601.392	1755.1	598.959	1332.91	585.359	820.451	582.948	1093.71	583.977	1140.7	598.959	2384.64	583.977	582.948	2339.38	2327.59
60	2162.5	1719.24	1312.9	775.036	2626.91	1842.2	1312.9	790.517	2162.5	1892.27	2035.34	1727.19	2626.91	582.997	2035.34	583.006	1836.33	2306.51	599.381	775.036	3007.09	1816.09	614.907	1836.23	600.966	3044.8	599.381	790.517	600.966	614.907	1728.05	583.006
61	2189.6	551.544	1674.13	943.653	1158.79	2076.37	1674.13	943.637	2189.6	1963.27	2231.52	2238.61	1158.79	801.503	2231.52	2069.32	1542.02	2179.21	1558.98	943.653	866.605	1737.05	1758.04	1782.2	601.382	715.395	1558.98	943.637	601.382	1758.04	1799.08	2069.32
62	583.038	1670.11	2478.76	1473.02	1867.29	2755.82	2478.76	1060.72	583.038	2007.34	636.96	2288.66	1867.29	1508.98	636.96	775.524	1097.66	2347.47	2327.49	1473.02	1831.24	1483.9	799.434	879.58	2076.39	852.485	2327.49	1060.72	2076.39	799.434	2846.64	775.524
63	1799.34	598.992	2525.73	1755.23	2133.48	2087.36	2525.73	1835.27	1799.34	2132.45	637.379	2823.87	2133.48	2428.62	637.379	2083.37	692.452	1179.68	3007.91	1755.23	593.561	2325.34	1886.05	957.67	790.501	979.563	3007.91	1835.27	790.501	1886.05	1471.89	2083.37
64	1444.03	1752.18	1663.12	2076.45	2008.4	599.986	1663.12	2326.61	1444.03	2232.51	1855.22	3008.14	2008.4	1756.17	1855.22	614.955	1282.83	599.95	2163.25	2076.45	1852.18	801.46	1808.04	2469.63	1807.17	2348.42	2163.25	2326.61	1807.17	1808.04	2189.34	614.955
65	1751.27	1756.23	583.024	583.021	1994.38	1659.12	583.024	3007.12	1751.27	2652.75	2065.35	812.994	1994.38	2155.39	2065.35	824.527	1800.27	600.944	915.592	583.021	1742.15	2057.06	1627.95	2287.61	2163.35	2643.52	915.592	3007.12	2163.35	1627.95	2538.48	824.527
66	2056.48	1835.31	1119.75	929.69	2554.82	2525.68	1119.75	1704.23	2056.48	1537.01	1895.28	823.561	2554.82	1807.19	1895.28	1850.22	2025.43	790.95	1399.85	929.69	1623	1782.08	1930.13	2346.62	2239.55	3010.85	1399.85	1704.23	2239.55	1930.13	1097.61	1850.22
67	586.419	1836.29	1275.88	1854.28	1613.12	1729.12	1275.88	824.539	586.419	2037.34	2513.66	929.66	1613.12	1900.25	2513.66	2287.61	2056.47	803.5	1541.92	1854.28	1782.15	800.453	2185.25	600.977	2539.63	2259.4	1541.92	824.539	2539.63	2185.25	2238.43	2287.61
68	1133.82	669.418	2243.58	958.689	1971.38	1785.18	2243.58	1852.25	1133.82	601.398	2612.72	957.688	1971.38	2184.41	2612.72	792.501	791.51	1198.71	853.509	958.689	1800.22	1503.89	2979.8	1816.26	2237.53	2287.44	853.509	1852.25	2237.53	2979.8	2343.43	792.501
69	1715.23	866.599	1171.79	1837.29	2080.49	600.988	1171.79	585.018	1715.23	1442.94	792.505	1558.08	2080.49	2400.58	792.505	2023.36	2184.53	2288.49	2184.31	1837.29	1872.29	601.358	2158.24	791.508	2327.57	2306.43	2184.31	585.018	2327.57	2158.24	829.459	2023.36
70	1900.39	1141.81	1676.15	1851.27	2171.57	601.394	1676.15	1171.78	1900.39	2155.43	1724.24	2076.4	2171.57	3508.28	1724.24	2554.73	2326.69	2344.46	2237.46	1851.27	2287.66	2656.32	2305.41	1756.17	2411.6	2326.42	2237.46	1171.78	2411.6	2305.41	891.497	2554.73
71	2225.64	1558.08	793.013	597.987	597.996	1508.03	793.013	1351.89	2225.64	2099.39	2595.74	1836.28	597.996	790.497	2595.74	1615.05	582.989	1208.73	599.966	597.987	2980.07	598.932	715.387	2289.63	958.635	585.331	599.966	1351.89	958.635	715.387	1626.95	1615.05
72	2294.74	1837.27	1728.18	1724.29	1273.88	2823.83	1728.18	2306.64	2294.74	2165.39	793.003	591.429	1273.88	877.551	793.003	1715.14	824.551	601.364	600.378	1724.29	2455.65	599.359	958.584	3039.09	1283.81	1744.08	600.378	2306.64	1283.81	958.584	801.468	1715.14
73	930.682	2077.46	1559.09	551.552	1834.34	923.58	1559.09	598.993	930.682	2659.77	1829.21	1704.26	1834.34	2752.76	1829.21	1762.21	1991.39	2238.46	1085.65	551.552	579.435	1779.04	1737.03	866.589	1949.28	579.407	1085.65	598.993	1949.28	1737.03	908.536	1762.21
74	1649.18	2400.65	1673.13	565.565	1851.26	1427.93	1673.13	599.414	1649.18	614.95	1956.29	1719.23	1851.26	3507.26	1956.29	1867.21	2289.74	2276.46	1816.14	565.565	2342.65	2432.33	1757.05	1719.2	2151.41	600.939	1816.14	599.414	2151.41	1757.05	1558.96	1867.21
75	2113.56	2662.83	2035.35	973.716	2087.49	1779.21	2035.35	1332.88	2113.56	615.394	1991.28	565.555	2087.49	761.5	1991.28	2133.4	957.662	2287.48	1873.13	973.716	600.957	1577.92	800.446	1831.26	907.568	601.358	1873.13	1332.88	907.568	800.446	1823.1	2133.4
76	1685.22	594.521	2184.48	824.563	1330.93	1851.2	2184.48	1158.77	1685.22	724.446	757.012	2056.39	1330.93	1715.12	757.012	879.563	1392.95	2327.48	582.977	824.563	601.384	2608.46	1719.02	2164.37	1719.15	2344.43	582.977	1158.77	1719.15	1719.02	1886.09	879.563
77	2026.42	1850.26	2189.51	1717.28	2083.48	2140.36	2189.51	879.57	2026.42	2327.6	775.015	2287.64	2083.48	776.999	775.015	915.628	1742.26	2345.47	615.369	1717.28	867.537	724.392	771.418	598.972	2343.54	593.528	615.369	879.57	2343.54	771.418	1894.12	915.628
78	2184.56	2752.81	2411.64	1956.33	2099.46	584.997	2411.64	1755.21	2184.56	812.514	790.998	2306.66	2099.46	1054.68	790.998	957.67	615.391	2539.53	995.593	1956.33	852.515	793.45	2538.41	1830.25	1867.2	1507.91	995.593	1755.21	1867.2	2538.41	2514.49	957.67
79	1627.16	1133.77	636.967	915.66	2856	585.371	636.967	1867.26	1627.16	831.531	1938.28	2777.95	2856	2068.3	1938.28	1757.22	1472	1781.09	1852.13	915.66	1781.18	1852.08	585.322	2155.43	2133.4	1208.7	1852.13	1867.26	2133.4	585.322	2539.48	1757.22
80	1747.27	1627.11	637.39	960.659	1674.16	637.372	637.39	1966.31	1747.27	565.546	2162.38	718.472	1674.16	1851.18	2162.38	2084.38	1718.28	2259.45	1000.61	960.659	2238.65	1914.08	1956.12	915.634	1881.21	1315.75	1000.61	1966.31	1881.21	1956.12	598.95	2084.38
81	2114.59	599.417	2069.36	1719.27	614.975	1171.76	2069.36	2327.63	2114.59	750.491	2176.47	824.551	614.975	585.363	2176.47	585.004	2081.52	3010.92	1033.65	1719.27	3008.13	2164.09	2076.19	929.643	944.607	1759.08	1033.65	2327.63	944.607	2076.19	599.372	585.004
82	2154.55	600.42	1615.08	1911.33	2046.47	2141.35	1615.08	1241.83	2154.55	1756.2	2294.61	775.026	2046.47	614.937	2294.61	1954.29	1133.74	1088.64	1219.75	1911.33	823.551	1508.88	615.351	958.656	1092.71	2076.22	1219.75	1241.83	1092.71	615.351	599.959	1954.29
83	1069.76	1671.1	1893.29	1762.25	2022.42	621.407	1893.29	1998.34	1069.76	2440.64	2518.64	583.013	2022.42	2467.57	2518.64	1718.21	1627.11	1558.97	1328.78	1762.25	2239.65	819.43	2008.14	1558.04	1102.68	2116.25	1328.78	1998.34	1102.68	2008.14	600.368	1718.21
84	1330.95	1244.9	1895.31	3008.17	2513.77	1836.25	1895.31	600.412	1330.95	597.969	2172.51	1851.25	2513.77	876.558	2172.51	1643.08	2076.52	2415.44	1674.02	3008.17	2309.65	1886.06	583.943	1758.19	1627.02	2228.36	1674.02	600.412	1627.02	583.943	614.929	1643.08
85	545.085	1851.25	2513.7	881.591	790.535	879.556	2513.7	750.499	545.085	983.654	1330.89	613.957	790.535	1340.9	1330.89	1835.25	594.532	790.478	2287.49	881.591	2327.65	2354.31	584.937	1773.18	1674.08	2302.4	2287.49	750.499	1674.08	584.937	692.415	1835.25
86	1862.33	597.37	2516.65	916.646	2162.46	1457.93	2516.65	979.644	1862.33	1862.24	2028.36	1956.31	2162.46	560.999	2028.36	1855.21	934.608	915.592	923.545	916.646	1830.27	958.598	2099.2	2470.67	2288.56	2314.42	923.545	979.644	2288.56	2099.2	1508.88	1855.21
87	2181.54	1330.9	1926.3	930.663	957.696	1673.09	1926.3	1471.99	2181.54	1914.26	2037.35	2327.64	957.696	1245.86	2037.35	598.983	1715.2	2346.49	1851.1	930.663	1911.27	1027.61	1172.67	2306.62	1399.88	2327.41	1851.1	1471.99	1399.88	1172.67	2076.23	598.983
88	1920.4	1816.27	1971.33	2069.39	1759.3	1759.23	1971.33	1782.22	1920.4	2046.38	2391.59	1991.3	1759.3	1984.27	2391.59	599.406	2021.4	1019.59	2140.23	2069.39	3044.09	1773.06	1756.03	823.549	1718.17	2342.41	2140.23	1782.22	1718.17	1756.03	3007.85	599.406
89	2080.52	1911.33	1994.35	1194.83	1155.81	2077.43	1994.35	880.57	2080.52	2133.42	2417.62	2137.47	1155.81	2518.64	2417.62	1956.29	2026.39	1091.66	1411.85	1194.83	881.564	1841.08	2172.33	893.627	1808.16	2366.39	1411.85	880.57	1808.16	2172.33	2237.43	1956.29
90	615.42	1749.17	775.53	1542.06	1663.15	2478.68	775.53	1717.22	615.42	2417.59	2539.68	894.617	1663.15	1919.25	2539.68	615.395	2145.49	1541.92	775.492	1542.06	1853.29	2076.1	1782.03	1245.86	521.299	596.372	775.492	1717.22	521.299	1782.03	600.946	615.395
91	1893.36	1862.24	2140.39	2162.43	1685.19	3507.32	2140.39	1673.12	1893.36	1087.7	1558.09	916.638	1685.19	2237.53	1558.09	2288.61	2306.74	2240.45	1158.71	2162.43	1341.88	2166.13	2016.12	621.415	1207.74	905.507	1158.71	1673.12	1207.74	2016.12	601.359	2288.61
92	2132.55	585.39	1953.31	2289.69	1727.21	792.498	1953.31	1956.31	2132.55	2189.5	2610.78	1125.74	1727.21	888.582	2610.78	2306.61	823.563	2289.48	1750.01	2289.69	2344.66	2363.28	1873.09	790.984	1750.08	958.6	1750.01	1956.31	1750.08	1873.09	771.441	2306.61
93	2143.49	1785.2	1956.31	2326.66	1762.3	2533.76	1956.31	2076.41	2143.49	2190.52	888.598	1245.89	1762.3	1673.08	888.598	2325.59	1704.29	2309.48	1106.67	2326.66	508.38	600.933	2145.17	1800.19	790.971	1358.81	1106.67	2076.41	790.971	2145.17	2209.35	2325.59
94	2626.97	565.558	600.416	538.456	2056.46	1755.19	600.416	1542.02	2626.97	2243.57	1693.13	1340.95	2056.46	879.548	1693.13	2478.68	579.457	583.962	1490.92	538.456	851.513	613.906	2289.41	2540.66	1641.03	1911.15	1490.92	1542.02	1641.03	2289.41	2212.35	2478.68
95	591.444	1659.13	615.401	825.572	2612.82	1756.2	615.401	565.559	591.444	823.55	2826.84	1429.96	2612.82	1628.06	2826.84	1340.92	1244.88	1890.12	2290.48	825.572	907.581	908.538	2306.39	3047.06	1742.17	1230.71	2290.48	565.559	1742.17	2306.39	1640.96	1340.92
96	1099.76	1970.31	1105.74	1779.27	1627.13	1835.26	1105.74	1289.85	1099.76	915.631	593.59	1612.07	1627.13	1930.29	593.59	1693.12	1559.08	593.534	669.392	1779.27	1758.15	1558.95	601.351	585.375	1351.83	1351.78	669.392	1289.85	1351.83	601.351	2659.56	1693.12
97	1443.01	2140.39	1747.2	1354.91	1731.2	979.63	1747.2	1312.89	1443.01	1719.21	786.516	1641.1	1731.2	2680.78	786.516	995.646	1727.23	1756.1	970.598	1354.91	880.579	2389.28	1747.99	508.376	1490.96	1818.08	970.598	1312.89	1490.96	1747.99	797.471	995.646
98	1293.91	583.012	2087.4	1069.73	601.015	2754.8	2087.4	1779.24	1293.91	2468.68	812.516	1685.15	601.015	1508	812.516	1704.22	1949.37	937.572	1244.82	1069.73	894.603	1093.64	1823.05	560.998	535.355	2239.41	1244.82	1779.24	535.355	1823.05	1693	1704.22
99	1971.41	1755.21	2170.47	1718.28	601.419	2826.85	2170.47	637.381	1971.41	2596.72	598.996	1715.14	601.419	2170.41	598.996	1808.22	2163.51	619.936	1472.9	1718.28	2343.65	1433.91	801.451	584.993	1172.74	2299.39	1472.9	637.381	1172.74	801.451	1998.15	1808.22
100	2015.42	1854.26	2176.53	803.55	829.523	1663.09	2176.53	973.698	2015.42	2662.8	599.415	1762.23	829.523	831.511	599.415	608.386	2389.71	1704.12	2626.67	803.55	2517.75	2023.12	2239.37	614.399	1155.73	2341.38	2626.67	973.698	1155.73	2239.37	2008.19	608.386

## Sheet: TOP100_P_RF_(SupFig_7D)
Rank	The 1th supervised testing	The 2th supervised testing	The 3th supervised testing	The 4th supervised testing	The 5th supervised testing	The 6th supervised testing	The 7th supervised testing	The 8th supervised testing	The 9th supervised testing	The 10th supervised testing	The 11th supervised testing	The 12th supervised testing	The 13th supervised testing	The 14th supervised testing	The 15th supervised testing	The 16th supervised testing	The 17th supervised testing	The 18th supervised testing	The 19th supervised testing	The 20th supervised testing	The 21th supervised testing	The 22th supervised testing	The 23th supervised testing	The 24th supervised testing	The 25th supervised testing	The 26th supervised testing	The 27th supervised testing	The 28th supervised testing	The 29th supervised testing	The 30th supervised testing	The 31th supervised testing	The 32th supervised testing
1	1738.34	1739.26	1760.26	1813.29	1740.31	1738.24	1738.27	1775.29	1700.37	1740.23	1739.24	1812.27	1740.31	1813.22	1740.25	1812.25	1812.31	1700.15	1738.14	1776.33	1812.19	1812.07	1812.07	1812.23	1812.21	1700.12	1738.14	1812.27	1812.21	1812.07	1776.15	1774.28
2	1700.37	1700.29	1739.27	1812.3	1776.35	1740.22	1740.28	1813.27	1701.39	1812.25	1740.25	1775.3	1812.33	1740.2	1812.27	1774.28	1776.31	1813.13	1813.15	1740.3	1813.19	1813.03	1776.11	1775.24	1740.2	1740.09	1700.17	1775.29	1740.2	1774.12	1738.12	1812.25
3	1740.35	1738.27	1777.31	1700.31	1812.33	1813.25	1760.26	1703.26	1702.37	1738.24	1738.25	1776.29	1739.3	1774.25	1774.29	1776.27	1702.32	1776.17	1812.15	1738.28	1700.2	1774.14	1774.12	1700.23	1776.23	1776.14	1813.15	1703.26	1797.2	1813.07	1774.16	1775.27
4	1701.39	1701.31	1740.28	1739.29	1703.32	1739.23	1700.32	1739.24	1740.35	1702.26	1774.29	1702.28	1776.35	1775.24	1739.24	1740.22	1701.32	1738.13	1740.15	1701.33	1775.27	1776.11	1775.13	1740.21	1738.19	1813.11	1812.15	1761.25	1776.23	1775.13	1775.16	1776.27
5	1702.37	1813.27	1700.32	1776.33	1814.32	1700.26	1739.27	1776.3	1812.36	1700.26	1776.29	1774.3	1777.33	1739.2	1738.25	1775.27	1777.32	1702.16	1776.18	1812.3	1701.22	1775.14	1813.07	1776.24	1703.21	1812.1	1740.15	1740.25	1813.21	1776.11	1812.12	1813.24
6	1814.35	1760.26	1702.31	1701.33	1701.37	1776.28	1812.29	1812.27	1738.34	1813.24	1775.3	1814.27	1701.37	1738.21	1775.3	1813.24	1738.28	1701.18	1700.17	1700.31	1738.22	1700.08	1701.11	1702.24	1700.22	1723.08	1776.18	1741.24	1738.19	1738.07	1813.12	1703.24
7	1812.36	1777.29	1813.29	1740.3	1739.3	1812.25	1777.31	1774.3	1703.35	1774.27	1812.27	1700.28	1814.32	1812.22	1700.29	1703.24	1700.3	1812.13	1774.19	1702.31	1739.18	1796.1	1740.05	1701.23	1813.21	1797.11	1701.2	1776.3	1701.24	1700.1	1701.16	1702.25
8	1776.37	1812.27	1738.27	1738.28	1702.34	1703.24	1702.31	1740.25	1739.34	1701.26	1814.25	1738.25	1775.36	1776.25	1701.28	1702.25	1740.3	1739.14	1777.16	1777.32	1776.21	1701.13	1738.07	1813.23	1775.26	1774.15	1797.14	1739.24	1775.26	1702.1	1740.11	1738.23
9	1777.36	1776.3	1701.33	1702.31	1813.33	1774.27	1813.29	1797.28	1777.36	1739.22	1700.29	1701.28	1700.34	1701.24	1776.29	1738.23	1739.28	1774.18	1775.2	1798.3	1797.25	1739.09	1700.1	1814.22	1777.2	1701.14	1777.16	1798.25	1777.2	1701.11	1700.15	1739.21
10	1739.34	1740.27	1814.28	1777.32	1738.31	1760.23	1776.32	1738.25	1813.36	1776.26	1701.28	1813.26	1738.31	1700.24	1702.28	1814.24	1774.33	1797.16	1739.14	1814.31	1702.25	1797.12	1703.09	1774.24	1797.2	1738.1	1774.19	1797.28	1703.21	1740.05	1739.12	1701.25
11	1774.37	1702.29	1775.32	1797.31	1700.34	1814.25	1775.32	1723.25	1814.35	1814.25	1702.28	1796.29	1774.34	1814.22	1813.26	1739.21	1796.33	1740.13	1701.2	1813.29	1703.21	1738.1	1702.1	1796.24	1741.18	1798.09	1702.17	1813.27	1741.18	1796.08	1777.14	1740.22
12	1703.35	1797.27	1812.29	1814.31	1777.33	1775.27	1814.28	1761.25	1776.37	1777.25	1777.28	1797.29	1702.34	1777.23	1814.25	1741.21	1814.31	1798.13	1723.12	1739.29	1740.17	1702.13	1741.05	1738.21	1701.24	1739.1	1760.14	1723.25	1774.24	1814.09	1702.15	1814.24
13	1813.36	1703.27	1776.32	1778.29	1774.34	1701.28	1774.31	1798.25	1775.39	1775.28	1813.26	1740.26	1703.32	1703.22	1777.28	1701.25	1703.3	1723.11	1760.14	1797.31	1777.18	1760.09	1814.09	1739.2	1774.24	1796.11	1739.14	1700.29	1739.19	1798.07	1703.13	1700.26
14	1775.39	1774.3	1722.28	1774.33	1775.36	1777.26	1703.28	1700.29	1774.37	1778.23	1722.25	1739.25	1761.3	1761.21	1722.25	1700.26	1775.36	1777.15	1703.15	1774.33	1774.32	1740.04	1739.07	1703.24	1739.19	1741.08	1703.15	1777.28	1702.22	1739.07	1814.12	1796.25
15	1796.36	1723.26	1703.28	1723.28	1723.3	1798.23	1701.33	1814.27	1778.34	1796.26	1815.24	1777.27	1813.33	1702.23	1760.24	1722.22	1813.31	1760.12	1702.17	1775.34	1814.24	1814.09	1797.08	1797.25	1814.21	1775.16	1775.2	1738.25	1700.22	1741.05	1796.13	1777.25
16	1798.34	1798.27	1774.31	1798.3	1798.31	1797.25	1722.28	1702.27	1797.35	1797.25	1797.26	1778.26	1797.32	1778.21	1815.24	1797.26	1797.32	1775.19	1797.14	1723.28	1798.23	1778.08	1798.07	1778.22	1798.19	1834.11	1761.12	1814.27	1814.21	1760.05	1722.1	1741.21
17	1723.33	1796.29	1797.27	1796.32	1760.32	1741.22	1761.27	1741.24	1815.32	1703.25	1778.25	1703.27	1815.34	1797.23	1703.26	1777.25	1778.29	1796.15	1796.15	1796.32	1796.26	1777.1	1778.06	1777.22	1702.22	1703.11	1814.15	1701.3	1798.19	1703.09	1797.12	1723.22
18	1815.32	1775.31	1778.28	1703.3	1815.34	1702.25	1723.27	1701.3	1796.36	1760.22	790.506	1760.24	1723.3	1796.22	1797.26	1796.25	1723.27	1814.16	1814.15	1778.29	1815.22	1703.11	1796.08	1760.21	1723.17	1814.12	1798.13	1774.3	1760.21	1797.08	1778.1	1722.22
19	1778.34	1814.28	1761.27	1760.28	1761.3	1761.24	1796.29	1777.28	1798.34	1723.23	1703.26	1815.26	1798.31	1798.21	1778.25	1778.24	1815.31	1850.1	1798.13	1703.3	1760.18	1723.09	1777.07	1798.24	1761.17	1760.08	1778.13	1702.27	1796.21	1777.07	1760.09	1797.26
20	1760.34	1778.27	1798.27	1775.34	1797.32	1723.23	1798.27	1796.28	1723.33	1741.21	1723.24	1741.24	1722.31	1741.19	790.506	1815.24	1798.3	1778.12	1778.13	1799.3	1741.18	1815.08	1760.05	1723.21	1796.21	1777.11	1723.12	1760.25	1778.19	1723.05	1741.1	1761.23
21	1797.35	1722.27	1723.27	1761.28	1796.32	1722.24	791.535	1760.25	1760.34	1722.24	1760.24	1723.25	1760.32	1722.21	1796.26	1723.22	1760.27	1703.14	1741.13	1760.28	1778.2	1798.09	1815.06	1718.18	1760.21	1702.11	1741.13	1796.28	1723.17	1815.06	1815.11	1815.24
22	1722.34	1852.26	1796.29	1815.31	1741.29	1834.24	791.008	1722.25	585.036	1815.24	1741.23	1722.25	1741.29	1723.2	1723.24	1798.23	585.372	1834.15	1850.11	1761.28	1723.18	1741.04	1723.05	1815.21	1778.19	1761.08	1722.13	1834.28	1761.17	1761.07	1723.1	1760.22
23	585.036	1815.27	791.008	1799.3	1722.31	1796.25	1797.27	1850.24	1722.34	1968.29	1796.26	1799.26	1778.32	1760.2	1741.23	1761.23	1722.28	1741.11	1722.13	1815.31	1718.17	1717.11	1722.06	1741.18	1722.17	1850.07	1796.15	1778.26	1815.19	1778.06	1798.11	1798.23
24	791.564	1741.25	2824.86	791.014	593.614	1815.26	1778.28	1834.28	1741.32	1798.25	1051.67	791.529	593.614	1815.23	2164.41	1760.22	1741.27	1761.14	1761.12	1741.27	1834.23	1835.03	1717.04	1717.2	1815.19	1835.1	1850.11	1722.25	1722.17	1718.05	1761.1	1558.07
25	790.547	593.583	790.515	1850.27	1609.11	1778.24	2824.86	1799.27	2035.44	1718.23	791.523	1717.26	2478.82	1717.18	1747.17	1966.27	584.983	1815.13	1835.15	585.398	1851.22	1722.08	1850.04	1761.22	585.356	1815.1	1815.13	1850.24	585.356	1834.07	1715.01	1778.24
26	791.036	1761.26	2539.7	1722.29	1778.32	593.573	1815.3	1778.26	1926.37	1244.87	1761.24	601.405	1724.33	1724.21	1761.24	2540.66	1873.34	579.42	1834.14	791.542	1799.26	801.46	2540.43	1722.21	1956.24	1722.08	585.346	2823.87	1956.24	1850.04	1244.8	2076.38
27	1741.32	1724.26	614.972	593.594	1956.36	790.99	2626.86	2823.87	2081.55	1717.23	1715.15	1244.89	1609.11	1718.2	1244.88	1244.88	1834.34	1779.1	1836.15	599.423	1850.21	1799.07	1761.07	1244.87	1799.19	1778.09	614.937	1800.23	1724.21	1717.04	2164.24	775.007
28	1761.32	791.006	2595.78	579.437	2478.82	1724.24	1724.27	1815.26	1866.32	2084.38	2008.33	790.52	1807.29	790.979	1798.25	1509	1956.35	1835.17	1799.12	1722.29	1831.24	1761.09	1340.81	1799.25	1851.15	1799.09	1834.14	1799.27	2540.67	1340.81	2468.51	1724.23
29	2035.44	579.429	593.594	584.023	2076.46	1837.24	2826.88	791.526	598.004	858.562	1724.24	791.003	2826.95	2539.63	1807.22	1612.06	1761.27	1717.13	2824.65	791.014	1724.19	1850.01	1834.07	1835.25	2540.67	1800.08	2824.65	1815.26	1717.15	1816.08	1748.03	1834.24
30	880.622	2169.51	2626.86	1741.27	1615.11	2164.4	1741.26	1816.27	593.626	2065.35	1615.06	829.517	1867.29	2540.62	1717.23	2069.32	1283.84	1851.11	585.346	585.02	1873.31	1340.83	799.434	1850.2	593.572	1949.15	584.967	1816.27	1834.22	1244.77	2172.36	1807.21
31	1641.15	1799.27	2162.41	2824.91	2145.46	1816.24	2076.39	775.017	2007.46	1761.23	2410.65	1761.25	1796.32	1762.19	2316.6	1558.07	1102.71	1722.13	584.967	1834.35	1717.25	1873.11	1724.07	1508.99	1724.21	1851.07	2164.27	775.017	593.572	1724.07	2184.27	1612.06
32	2081.55	1558.08	1741.26	2823.91	1837.32	1850.22	2823.87	1800.23	2478.86	2022.38	2626.82	1798.27	2083.48	2083.35	2083.4	1704.22	1850.26	1873.15	2076.26	2823.91	1722.2	1719.03	1757.05	1956.27	1816.2	881.522	790.959	1762.23	584.975	1722.06	1596.92	1704.22
33	2056.48	597.979	791.535	614.977	2164.49	2099.39	637.39	593.586	791.036	622.973	1807.22	585.012	1704.31	1073.68	1724.24	1627.06	1851.27	1799.12	1815.13	614.977	1835.24	2238.31	1835.07	1834.28	1834.22	1724.1	1836.15	1140.8	1949.28	2065.18	625.33	601.395
34	1799.34	1779.24	1815.3	599.001	583.029	614.951	593.594	1140.8	2193.61	2182.46	1748.16	1836.28	2164.49	2008.3	1727.17	2076.38	790.511	1911.17	790.959	615.411	1761.16	1834.06	2326.38	1093.71	1850.17	615.358	601.362	601.4	1715.12	771.418	771.441	2326.58
35	636.987	1782.26	1724.27	585.02	1704.31	561.011	2539.7	1762.23	1293.91	791.518	1717.23	1718.25	1855.28	1719.18	790.998	1807.21	1799.29	598.942	637.345	599.001	3047.03	802.442	1831.13	2980.08	584.975	621.396	1065.64	1851.22	1807.17	1835.07	1914.11	1850.22
36	1727.25	614.964	1973.32	599.423	1630.14	1704.22	2282.59	2076.41	2856.05	871.564	1244.88	2037.36	775.039	2256.49	1509.01	2184.43	583.983	614.918	2825.67	2824.91	1340.86	1831.13	791.448	1737.18	1490.96	1811.06	1356.85	614.965	1718.17	1800.04	2166.29	1759.23
37	1282.9	615.4	2823.87	585.398	1293.89	2525.68	1922.32	1514.01	1956.38	1097.7	1855.22	585.39	1952.35	1757.2	1615.06	2626.8	1816.3	1088.64	2164.27	593.594	3045.06	2539.36	1363.83	1359.92	1704.2	1956.13	1816.14	790.998	1799.19	2164.2	2211.34	1609.05
38	2626.97	600.997	2164.44	2076.45	585.393	1718.22	614.972	1881.23	614.99	2139.43	2084.4	1627.09	1747.25	997.621	2007.37	2342.58	1831.35	615.36	600.955	2076.45	614.929	1756.07	1718.05	593.572	1676.09	3050.84	2169.32	1837.26	1351.83	1196.68	2008.19	1799.24
39	598.401	791.532	2076.39	601.41	1685.19	1558.06	2145.41	1558.08	2778.08	877.57	888.598	1326.88	583.029	792.489	1748.16	600.986	1623.09	1836.14	881.538	1850.27	1704.19	724.392	1021.59	1719.2	1727.14	1755.06	1799.12	2826.89	1230.76	1799.06	1724.1	1244.88
40	2642.93	2112.47	1852.25	791.542	614.975	1854.25	790.515	1837.26	2082.52	613.949	829.503	599.992	1900.36	1245.86	2667.73	593.581	599.395	2154.29	1748.05	1724.29	1508.93	872.487	1728.01	1830.25	1835.2	2164.21	583.971	2164.45	1850.17	1382.82	1068.59	2017.28
41	2189.6	790.517	1559.09	1852.28	2826.95	2076.37	1076.71	2826.89	1852.31	1836.27	1956.29	1641.1	1856.33	1709.12	2378.62	585.004	1429.97	1724.12	2123.24	584.023	600.957	1244.76	1816.08	1851.23	1210.75	624.337	1626.97	1627.08	1676.09	621.918	790.47	1241.82
42	2026.42	2755.86	1328.89	1782.26	1054.72	600.988	1328.89	1956.31	2626.97	1762.2	1693.13	1312.88	1759.3	1340.9	1998.3	1151.73	1717.27	1949.18	1356.85	2026.38	1956.27	614.369	3044.79	1245.86	825.528	579.407	1800.12	1807.22	1507.98	2343.36	1340.83	1831.29
43	1578.14	2681.82	2282.59	1800.26	1807.29	1729.12	1866.29	1854.27	2076.53	801.514	757.012	972.649	2194.57	2412.59	2170.44	1328.86	1779.28	1800.09	593.548	2282.63	3023.09	511.992	2343.36	3007.08	1914.2	771.428	1370.81	1759.26	1257.79	1855.06	2123.22	1245.88
44	1956.38	774.514	1312.9	2595.74	2626.91	1606.06	1855.25	866.595	1994.42	2038.33	2076.38	1429.96	1673.16	3007.05	791.523	2055.31	808.524	585.347	1800.12	1429.99	1504.96	983.57	1851.04	1623.03	621.422	1399.8	2076.26	791.526	2326.54	792.44	614.929	1643.08
45	1724.32	1800.24	597.994	599.999	601.015	790.505	1628.1	2432.67	1855.3	2145.4	692.44	793.009	551.555	2400.58	2181.43	1340.92	2184.53	1478.87	1038.62	2162.43	2493.68	2343.3	1910.11	1759.18	1719.15	2140.2	1727.09	2076.41	1984.25	1830.1	1683	1956.29
46	2017.42	2140.39	2525.73	790.529	791.019	1762.22	793.013	600.997	2372.74	2249.52	1973.28	2008.37	577.386	2171.48	2023.37	1200.81	1472	1198.71	2162.24	1938.34	614.392	1622.94	2562.49	792.508	1868.21	825.499	791.483	1717.22	1241.77	2287.4	1855.09	824.527
47	593.626	2022.37	866.594	1019.68	2184.53	2141.35	775.025	1287.85	2411.78	1892.27	1000.66	893.631	1965.37	1756.17	2166.49	790.509	2738.91	601.364	934.564	1956.33	1852.18	2596.38	2164.2	2342.59	1998.25	2644.54	792.967	2184.46	1442.89	2432.43	1318.77	1851.2
48	2143.49	598.386	2140.39	823.572	2628.9	2111.42	1473	790.517	2017.42	2652.75	2164.41	614.969	2171.57	1746.14	3008.08	1850.22	614.954	1719.1	1399.85	1108.77	1719.15	800.453	2809.6	614.95	710.447	3005.85	2123.24	2327.63	1035.65	1261.68	2197.31	1887.22
49	2193.61	600.42	585.019	2016.35	2107.44	2069.32	601.403	1695.13	1641.15	2580.71	1798.25	2026.36	1799.31	2525.65	2140.36	2823.83	1055.69	583.962	852.505	2081.48	1382.89	2514.35	2846.58	3045.08	2555.67	621.925	1509.9	593.586	2238.55	1245.77	797.471	2826.85
50	1885.33	777.519	1663.12	2162.43	1900.36	791.515	2550.8	570.35	586.419	1779.23	2132.42	2076.4	2153.51	1831.27	2626.82	2478.68	659.365	2401.45	1033.65	649.421	2146.49	2480.36	1799.06	1930.28	1680.06	1890.08	1779.11	1558.08	1727.14	1762.06	2429.42	2626.8
51	1678.18	870.581	2012.34	1755.23	2525.79	1917.28	601.007	1244.89	790.547	1890.23	1340.93	1685.15	1456.01	2313.53	1709.14	622.41	1190.74	681.371	1724.14	2325.66	2848.9	2540.37	1324.74	1756.17	860.543	1873.1	1867.12	2007.37	1489.97	2116.23	1038.61	1060.7
52	1782.33	1108.75	2508.68	1834.35	1513.04	1956.28	1559.09	568.339	1715.23	2280.59	1728.16	2595.72	1054.72	2232.49	1558.09	824.527	1097.66	669.397	1411.85	3509.44	1439.91	1742.07	514.279	1658.08	1257.79	2453.43	1257.76	2384.64	1914.2	3044.79	1835.12	2023.36
53	1807.32	1627.11	630.405	2069.39	1724.33	2140.36	597.994	1835.27	1751.27	1955.27	1799.23	2468.71	1966.35	1834.24	2143.4	501.057	1516	2359.48	2823.65	601.41	1837.22	2199.27	1245.77	560.998	2076.39	852.485	1998.18	1164.79	1340.87	1118.63	1834.14	660.41
54	2079.55	1171.78	2096.44	1328.91	2077.49	1842.2	1800.25	2069.35	636.987	1498.99	1727.17	1751.19	2165.5	1444.96	890.518	2219.53	2175.59	2076.27	1328.78	1835.32	601.384	2288.34	1886.05	1444.97	1748.1	1362.83	790.48	1735.23	2133.4	2809.6	2656.53	1718.21
55	2856.05	1963.31	1799.26	615.411	2181.51	1799.24	2526.68	2237.59	1628.15	1749.14	1998.3	1612.07	1956.36	2084.35	1756.21	1717.21	934.608	1544.91	1851.1	2107.41	1282.8	617.323	2076.19	1382.93	1591.02	1590.96	1244.82	2069.35	1274.8	1831.13	947.579	1914.27
56	2007.46	1836.29	1044.7	601.004	1855.28	1867.23	1973.32	1851.22	808.557	1504	1482.99	915.644	1718.3	2467.57	1749.16	829.495	930.626	2658.61	2326.45	1718.28	1779.23	2563.34	1795.07	1201.79	600.391	593.528	1755.09	1998.34	881.552	1399.8	1717.08	2540.66
57	599.019	1909.25	2171.52	2524.77	1799.31	979.63	1158.78	1900.3	598.401	2185.46	2143.4	2656.8	2080.49	1800.19	2231.52	1900.27	2863.91	565.508	995.593	1899.28	568.98	2411.29	2185.25	1341.91	2184.38	1718.07	1146.7	579.421	1591.02	560.949	692.415	790.987
58	1350	1956.3	2478.76	1079.73	1558.14	2654.76	1971.33	2483.7	1724.32	764.468	1709.14	1642.1	791.019	1783.15	2468.71	585.37	986.648	599.95	790.48	583.021	1543.97	986.594	827.472	2325.6	1358.84	1402.84	2140.23	923.593	829.483	1787.04	1737.07	791.513
59	1715.23	2539.71	1704.26	1956.33	2194.57	2395.62	1823.23	2524.72	2022.45	1767.19	2017.3	1443.98	1242.86	1609.03	2189.5	867.525	1773.23	1718.12	635.917	2387.66	1444.95	657.363	1244.77	2023.37	1695.07	2076.22	930.591	1881.23	692.444	1956.12	1490.89	1717.21
60	2647.93	1850.26	1816.28	1125.76	2754.9	629.395	636.967	1836.26	1764.3	1799.23	1866.26	3010.14	2181.51	536.357	858.56	1747.17	894.624	1541.92	1432.89	1755.23	1320.81	1508.88	2327.37	828.528	2163.35	790.468	1513.93	1340.92	1745.15	1851.04	566.43	516.331
61	1752.26	2753.84	1132.78	1835.32	1158.79	2539.67	2595.78	1102.73	1704.35	2133.42	1274.83	1559.07	1171.81	2680.78	2076.38	1834.24	2026.39	621.416	1513.93	1854.28	2570.79	1226.74	637.314	1831.26	771.463	1794.13	2326.45	1057.7	1283.81	876.512	582.968	1816.25
62	1897.35	681.408	1158.78	583.021	1241.85	2202.52	1663.12	1724.26	729.516	2659.77	2189.5	1850.25	1422	2524.63	2408.65	775.007	2081.52	1757.11	1472.9	659.398	621.429	790.938	2524.43	1724.19	598.966	1341.8	1748.05	1287.85	1207.74	1444.87	513.305	1512.98
63	1097.76	2738.85	1674.13	2160.52	1718.3	1728.14	1749.19	1856.28	881.606	812.514	2312.59	2697.82	2060.45	2806.78	2414.6	2408.63	1727.23	1236.74	533.332	1310.9	2538.71	1374.8	3006.8	2396.63	566.443	1544.88	1890.1	1587.09	2149.38	1886.05	1035.62	2513.68
64	2755.96	1671.1	1457.96	1902.32	2046.47	1335.87	2045.42	995.652	600.017	506.373	1747.17	1727.19	2091.45	516.319	2518.64	1685.12	1823.24	584.956	636.933	600.424	853.519	2401.28	1612.93	942.615	1444.95	760.965	852.505	1351.89	1773.13	1905.09	2514.49	1715.14
65	1762.29	1141.81	1762.26	1627.12	2064.45	2015.33	2652.8	1457.96	599.44	1442.94	1067.65	2738.86	2176.59	1224.79	2320.54	1673.11	954.631	1221.72	791.483	1571.1	2635.81	599.359	1749.95	791.508	1282.81	565.504	923.545	640.409	790.501	1965.1	1903.15	2756.82
66	2225.64	1834.26	786.523	1080.73	2018.42	1674.11	1069.73	601.4	599.019	1599.04	577.367	1735.22	1717.27	1649.07	1067.65	1358.93	2696.85	771.443	1852.13	2015.39	579.435	853.491	774.944	715.427	934.591	1140.7	1038.62	1542.02	1315.82	1704.05	1508.88	585.37
67	2270.66	2174.58	1558.1	2468.7	2123.44	1745.19	1926.3	537.48	697.474	1900.28	2052.35	600.995	1612.15	1244.86	2539.68	2514.68	2131.56	614.379	3006.88	777.529	2035.37	3005.78	792.44	1480.95	1212.75	1927.14	593.548	1727.17	867.526	2076.19	1799.08	2008.33
68	2734.97	2220.55	598.379	1537.05	1097.75	2129.47	1039.68	2060.41	1966.38	2284.58	2231.52	2167.49	791.547	1704.2	1242.83	1800.21	2050.45	629.892	1964.21	1019.68	2718.86	1863.09	1824.03	601.395	1531.94	1505.92	1122.68	1289.85	1680.06	2540.43	1245.8	2068.32
69	600.44	2233.55	1956.31	2644.83	2227.63	1171.76	2449.69	2629.84	600.44	2155.43	2099.39	2408.65	1158.79	2077.4	1442.94	1856.26	2122.48	667.411	1512.9	944.65	1911.27	2445.32	1564.92	3039.09	1825.17	1212.69	636.933	790.517	1219.78	2307.42	540.291	1200.81
70	692.476	2170.48	775.025	2363.65	601.419	1628.07	1762.26	2287.64	1473.05	2189.5	1926.28	1245.89	2087.49	699.416	1608.06	1888.25	2304.71	1704.12	1315.79	803.55	508.38	858.511	2354.37	2065.36	1867.2	1833.12	1046.62	1745.21	1627.02	2326.38	2777.71	583.006
71	1709.21	2417.63	2513.7	1688.18	1084.76	1717.19	2110.46	1060.72	2099.47	2023.4	1641.08	812.526	1859.32	2443.61	2243.56	2150.41	1106.69	1146.69	2140.23	2644.83	1557.99	585.339	1590.93	970.641	2151.41	2546.52	966.574	1835.27	1835.2	2437.4	1356.81	600.986
72	1916.37	2436.66	2612.76	804.561	1490.04	1663.09	1981.32	1855.24	637.399	623.394	2862.82	1998.33	2133.48	2478.68	1318.88	2143.38	2035.41	2240.45	991.592	579.437	958.63	819.43	1044.61	613.94	2562.63	614.916	1851.1	801.522	2164.35	796.434	2151.29	1471.97
73	743.521	1745.19	2411.64	1085.73	1709.19	615.39	880.573	2164.45	2609.91	598.983	1718.25	2084.42	1699.18	514.304	829.503	1727.16	1397.92	1505.96	1179.7	2259.66	1359.87	1326.76	2806.58	565.54	1189.71	2316.41	2626.67	1724.26	1800.18	1429.84	790.947	2133.4
74	829.547	1892.3	615.401	2085.44	1699.18	717.45	2018.43	979.644	2257.68	1068.65	1558.09	1991.3	2856	1807.19	1799.23	2557.78	1101.7	635.414	1541.92	1782.26	832.515	1516.87	1677.95	1816.26	2180.33	2653.55	919.57	1956.31	1816.2	1795.07	930.581	2159.41
75	1482.07	2123.37	2007.33	960.659	1429.99	1330.89	1019.68	1627.08	2681.94	1059.7	1628.09	621.428	2681.95	773.49	2145.39	2217.52	1282.83	2676.58	793.46	960.659	2295.67	2167.21	1758.04	1970.31	1171.73	2099.22	1640.99	1704.23	1818.18	2756.6	2017.13	2428.64
76	1576.12	1663.13	2143.43	1802.25	2087.49	1394.92	1084.73	2667.79	2230.6	2469.62	2280.56	659.384	1709.19	2184.41	1612.08	2133.4	2170.55	2319.44	856.494	1419.01	555.305	2189.27	2045.15	888.599	1758.18	635.895	1432.89	867.535	570.319	1402.82	2483.5	2292.61
77	2119.56	1755.21	2015.36	1102.75	1851.26	2113.44	1676.15	2085.41	565.587	636.416	2408.65	1514.02	2539.76	2203.51	792.505	791.513	578.386	790.478	866.575	1488.04	1143.72	1894.09	1836.07	1439.94	1932.25	797.465	1076.65	1084.73	1171.73	1759.06	1045.61	2327.59
78	2132.55	2526.68	775.53	1823.22	1676.19	2570.71	583.024	1369.88	1274.89	1239.82	1719.21	2325.64	1926.35	791.503	636.96	1851.2	1176.75	2853.61	1795.11	2144.46	1379.89	888.548	1973.1	1854.2	2164.35	1763.08	600.955	1092.74	2648.74	570.29	1836.12	923.582
79	2609.91	1929.31	2099.43	2245.6	636.972	2328.59	1070.74	602.403	2113.56	1127.74	2316.6	1092.73	1212.84	2038.33	692.44	2065.35	1344.84	851.495	1213.75	2432.7	1750.06	1851.09	601.351	1968.29	1111.7	2247.34	1680.01	2099.42	1629.03	1833.08	2210.38	1289.83
80	686.502	2023.37	2826.88	1349.97	2326.68	2267.54	1102.74	666.403	1718.34	591.37	2154.44	1300.85	2245.64	1383.91	1914.28	1541.01	1400.93	1782.12	1093.66	2846.95	2200.62	734.435	1246.74	2251.52	3007.03	2364.41	2346.48	1606.08	1513.95	2766.56	1925.14	1748.15
81	599.44	2195.53	2473.74	2094.44	2163.5	2077.43	731.492	2140.39	1560.13	2202.55	636.96	2165.41	2096.49	1558.05	1715.15	2141.35	1651.12	1208.73	2597.56	856.572	2253.62	2553.35	758.418	3008.09	720.451	1816.1	2210.4	600.997	913.542	1737.03	811.46	1026.69
82	1851.31	1851.25	2449.69	597.987	2176.59	1506.04	3008.13	1215.8	1873.37	1359.91	2422.64	810.527	1490.04	942.604	1362.94	826.558	2162.49	1318.77	1971.19	538.456	2403.62	796.455	1068.56	1221.79	1442.89	985.571	1928.15	1907.27	2193.43	777.448	1033.63	1842.2
83	2238.72	613.957	886.593	1578.11	2153.51	1416.94	1787.2	1406.91	2132.55	1719.21	775.015	1138.75	787.554	1956.26	757.012	1842.2	2581.86	1356.81	1998.18	2110.51	1816.23	1065.63	1071.6	2470.67	2095.36	1937.16	1315.79	1779.24	2981.01	2158.24	1217.73	2525.66
84	2170.56	2026.35	1952.3	1756.27	615.408	1759.23	1432.96	1531	2647.93	2175.52	2170.44	2099.4	1240.85	1968.27	2174.54	1724.23	1179.73	1507.92	851.503	790.529	1677.12	1581.93	2479.47	1976.33	1713.08	2013.14	2823.65	2434.69	830.482	801.451	1330.8	2478.68
85	1002.71	2194.54	793.013	616.305	1249.86	2110.42	1735.25	2227.54	3077.23	1737.17	1509.01	858.572	1715.22	1058.68	2634.78	1893.24	2185.57	1901.19	857.514	1614.09	771.457	2031.14	2679.54	2384.6	594.507	1396.82	1412.86	1171.78	950.589	714.388	1467.87	1747.17
86	1014.7	636.421	928.624	704.487	1846.3	1505	2077.45	2697.83	792.549	1093.71	2184.45	2280.63	2100.48	1281.83	2084.4	2470.66	2347.7	2037.19	2044.27	635.959	602.393	1836.11	2065.18	1782.2	607.43	1744.08	2597.56	924.594	2181.36	2163.19	1545.9	1155.77
87	2169.6	652.423	1275.88	879.601	2100.48	2478.68	1578.08	3045.08	2351.72	2231.51	2210.56	1715.14	924.619	1660.08	675.417	1835.25	1627.11	2038.21	2163.25	1332.91	1218.76	1175.67	2978.79	1800.19	829.483	2132.28	540.299	1852.25	855.536	2016.12	1606.94	1351.88
88	675.418	1651.11	1834.3	1036.72	2513.77	2755.82	2099.43	1954.32	2091.5	593.579	675.417	593.591	880.592	1923.25	1274.83	2344.59	570.328	2178.21	2190.33	958.689	1762.16	1893.03	578.32	2468.65	1735.15	2610.56	1154.71	1902.28	535.355	622.376	2612.52	1881.23
89	960.68	1785.2	518.311	1282.89	2420.73	923.58	1731.18	1351.89	1576.12	1047.67	1649.12	883.566	2001.4	2264.53	1092.73	1245.88	1432	2345.47	2691.62	2379.68	2209.58	1658.97	2606.52	1762.19	2068.3	1795.08	1933.15	599.996	540.312	686.399	2622.55	2312.57
90	1843.33	1871.27	2194.52	1998.37	1762.3	1751.15	728.488	937.625	2060.51	1268.83	2823.83	983.668	1513.04	2428.62	2270.55	2084.38	1658.14	2595.54	1824.09	1133.78	2524.73	558.935	2539.43	515.319	1674.08	1227.73	2085.25	1765.2	650.425	1686.98	2642.55	855.548
91	654.448	1639.12	1994.35	1506.09	2469.71	1965.3	1748.17	1728.16	1014.7	1667.08	2826.84	1260.83	1627.13	2108.31	1968.29	1998.29	1976.38	2596.55	1108.68	813.008	967.593	789.477	756.935	795.991	1783.14	887.548	1343.79	2269.57	1086.68	2327.37	2659.56	1800.21
92	1075.76	599.99	2343.64	1194.83	2135.52	2197.47	564.381	2639.79	1799.34	1930.32	1749.16	1423.94	774.528	1010.66	2052.35	1914.27	2369.67	2281.47	1525.95	619.419	1291.79	876.524	1395.8	915.634	2211.46	2216.35	671.396	2364.62	1580.98	1315.74	1055.65	671.418
93	1558.16	793.01	1627.1	734.496	2015.38	1998.31	737.488	1686.15	2408.78	2190.52	2753.81	1619.11	1516.04	2697.77	2862.82	2083.37	975.636	2306.51	1783.09	1998.37	1736.14	903.567	1855.06	599.977	659.372	3040.84	1155.7	1859.28	1879.21	2607.53	2212.35	1118.72
94	1666.18	1570.05	2045.42	776.541	561.028	1314.85	2069.36	615.402	2115.59	2294.65	2007.37	1800.23	585.023	1615.02	1489	2060.37	660.401	2232.41	966.574	598.396	1756.15	1130.69	927.519	776.515	556.316	2395.42	2155.31	1019.68	1736.13	2608.53	888.546	2055.31
95	600.017	2343.64	2550.8	1317.89	658.443	1782.2	2087.4	1704.23	2734.97	2514.68	1689.14	1823.21	1851.26	2754.75	2131.44	2151.43	1257.8	691.414	804.51	2265.6	558.959	2119.15	990.56	1683.08	886.545	820.438	1648.02	2626.84	1833.2	990.56	2339.38	1742.2
96	2092.52	598.992	601.007	1854.28	1677.18	1221.8	2100.44	1551.03	1475.04	2668.75	1044.69	1843.25	957.696	2667.7	1641.08	2325.59	2029.43	782.452	2172.37	2207.57	1494.86	848.489	1234.72	1917.26	2305.59	592.362	1558.98	636.956	2177.43	2675.48	2076.23	2823.83
97	2408.78	1704.26	929.672	2081.48	1920.37	2752.77	2612.76	1982.35	1773.29	1971.3	1491.99	2107.38	1881.3	515.309	1097.7	1718.21	2172.64	957.627	875.528	880.6	715.418	1956.09	1557.9	1965.27	1044.67	1186.69	1429.9	2409.65	890.504	2754.54	1358.8	651.417
98	1686.22	2440.68	737.488	2282.63	2538.77	2107.36	1122.76	1350.91	791.564	1816.25	2371.6	2177.49	801.543	776.002	1661.12	558.372	1035.66	1483.93	1375.86	1506.09	1833.19	958.598	1923.12	2344.61	540.312	3093.79	2300.43	2077.45	1658.05	667.383	1581.92	823.536
99	1751.27	2630.76	637.39	1972.32	1397.97	1365.9	1171.79	1164.79	2384.76	608.402	1916.32	2640.8	605.406	1121.73	1866.26	943.626	2225.66	2237.46	1596.96	2184.5	2115.45	1591.94	2150.25	801.507	775.505	1340.81	1401.88	2194.52	2009.3	726.398	1299.72	1419.95
100	2579.87	1494.94	1369.9	2825.92	1657.18	1244.87	539.338	1949.34	807.566	1783.18	2065.35	718.472	914.622	1608.04	1323.88	2093.41	2298.67	2277.46	1716.03	1888.3	2806.88	2065.13	1353.74	758.479	2368.53	1830.13	1597.97	637.381	567.001	1470.86	2177.28	983.645
